# Supplementary material for: Embryonic Hypotaurine Levels Contribute to Strain-Dependent Susceptibility in Mouse Models of Valproate-Induced Neural Tube Defects
Source: Front Cell Dev Biol. 2022 Feb 21;10:832492. doi: 10.3389/fcell.2022.832492 (PMC8898900; doi:10.3389/fcell.2022.832492)
Supplement: Supplementary file 5 [file Table4.XLSX]

## Sheet: Sheet1
Metabolite	SWV.stdev	C57.stdev	SWV.std.err	C57.std.err	SWV.mean	C57.mean	Fold_Change	log2FoldChange	t_value	pval	padj	SuperPathway	SubPathway	LCMS.Mode	KEGG	HMP	CAS.ID	Class	Subclass_1	Subclass_2	Subclass_3	Subclass_4
5-OH-Valproic acid	0.545894	145.451	0.11143	41.9881	1.00145e+06	39724.6	25.2097	4.65591	-11.3863	2.19038e-11	1.58365e-08	Drug metabolism	Valproic acid metabolism	ANPNEG	NA	NA	NA	NA	NA	NA	NA	NA
4-OH-Valproic acid	0.538548	0.368386	0.109931	0.106344	361776	15656.2	23.1075	4.53029	-11.0217	1.10331e-10	3.98846e-08	Drug metabolism	Valproic acid metabolism	ANPNEG	NA	NA	NA	NA	NA	NA	NA	NA
PC(15:0/22:2(13Z,16Z))	1.37002	182.853	0.279654	52.7852	32302.8	2588.45	12.4796	3.6415	-4.59208	0.000103974	0.00357968	Lipid metabolism	Glycerophospholipid metabolism	ANPPOS	NA	NA	NA	NA	NA	NA	NA	NA
SM(d18:0/20:0)	0.784006	106.792	0.160035	30.8282	4420.08	493.455	8.95741	3.16308	-7.27494	1.41025e-07	3.39871e-05	Lipid metabolism	Sphingolipid /ceramide metabolism	ANPPOS	NA	NA	NA	NA	NA	NA	NA	NA
SM(d17:1/24:0)	76.0317	182.588	15.5199	52.7087	6556.29	1082.39	6.05721	2.59865	-6.0214	1.28395e-06	0.000154716	Lipid metabolism	Sphingolipid /ceramide metabolism	ANPPOS	NA	NA	NA	NA	NA	NA	NA	NA
Melilotate	105.334	183.164	21.5011	52.8749	14213.6	3932.04	3.6148	1.85392	-4.3445	0.000124162	0.00408043	Amino acids	Phenylalanine metabolism	ANPNEG	C01198	HMDB33752	495-78-3	NA	NA	NA	NA	NA
PE(14:0/16:0)	1.17878	107.537	0.240617	31.0431	22427.7	6671.97	3.36148	1.7491	-3.00379	0.00587617	0.0416516	Lipid metabolism	Glycerophospholipid metabolism	ANPNEG	NA	NA	NA	NA	NA	NA	NA	NA
SM(d18:1/23:0)	1.02846	1.16416	0.209934	0.336064	19971.1	6483.72	3.08018	1.62302	-4.47034	8.77924e-05	0.00334073	Lipid metabolism	Sphingolipid /ceramide metabolism	ANPPOS	NA	NA	NA	NA	NA	NA	NA	NA
PE(18:2(9Z,12Z)/22:6(4Z,7Z,10Z,13Z,16Z,19Z))	0.44279	1.56748	0.0903842	0.452493	459237	175396	2.61829	1.38862	-4.18792	0.000350613	0.00667087	Lipid metabolism	Glycerophospholipid metabolism	ANPNEG	NA	NA	NA	NA	NA	NA	NA	NA
Glucuronic Acid	0.453035	0.157902	0.0924754	0.0455825	858611	337456	2.54436	1.3473	-3.17681	0.00415125	0.0348995	Energy metabolism	Pentose phosphate pathway	ANPNEG	C00333	HMDB02545	685-73-4	Carbohydrates	Monosaccharides	Sugar acids	none	none
SM(d18:0/18:0)	0.612113	0.883239	0.124947	0.254969	65130.6	25776.8	2.52671	1.33726	-4.76265	9.48132e-05	0.0034275	Lipid metabolism	Sphingolipid /ceramide metabolism	ANPPOS	NA	NA	NA	NA	NA	NA	NA	NA
DG(14:1n5/0:0/18:2n6)	0.737309	0.651078	0.150503	0.18795	45523.2	18942.4	2.40324	1.26498	-4.04026	0.000311656	0.0062591	Lipid metabolism	Glycerophospholipid metabolism	ANPNEG	NA	NA	NA	NA	NA	NA	NA	NA
Valeric Acid	0.603213	0.630337	0.12313	0.181963	39751	16681.9	2.38288	1.2527	-3.93991	0.000390626	0.0072416	Lipid metabolism	Fatty acid metabolism	ANPNEG	C00803	HMDB00892	109-52-4	Lipids	Fatty acyls	Fatty Acids and Conjugates	Straight chain fatty acids	none
3-Methyl Butanoic Acid	0.619093	0.653721	0.126372	0.188713	44637.2	19256.7	2.31801	1.21289	-3.87665	0.000461358	0.00813566	Others	N/A	ANPNEG	NA	HMDB33890	NA	NA	NA	NA	NA	NA
2-Hydroxybutyric acid	0.673939	0.250534	0.137567	0.0723229	374230	162270	2.30622	1.20553	-5.98266	2.05005e-06	0.000211741	Amino acids	Cysteine and Methionine metabolism	ANPNEG	C05984	HMDB00008	600-15-7	Lipids	Fatty acyls	Fatty Acids and Conjugates	Hydroxy fatty acids	none
Hydroxybutyrylcarnitine	0.549587	0.500068	0.112184	0.144357	308008	133768	2.30255	1.20324	-3.43304	0.00160318	0.0193183	Lipid metabolism	Carnitine metabolism	ANPPOS	NA	NA	NA	NA	NA	NA	NA	NA
SM(d18:1/20:0)	0.924848	0.816532	0.188784	0.235712	89557.6	39681.7	2.2569	1.17434	-4.27534	0.000308174	0.0062591	Lipid metabolism	Sphingolipid /ceramide metabolism	ANPPOS	NA	NA	NA	NA	NA	NA	NA	NA
SM(d18:0/22:1(13Z))	0.814718	0.83596	0.166304	0.241321	140017	64367.8	2.17527	1.12119	-3.61285	0.00123959	0.0157233	Lipid metabolism	Sphingolipid /ceramide metabolism	ANPPOS	NA	NA	NA	NA	NA	NA	NA	NA
Kynurenic Acid	0.810543	0.815731	0.165451	0.235481	284835	132072	2.15667	1.1088	-3.06117	0.00461849	0.0363066	Amino acids	Tryptophan metabolism	ANPNEG	C01717	HMDB00715	492-27-3	NA	NA	NA	NA	NA
N-Oleoyl Dopamine (OLDA)	0.812191	0.643499	0.165788	0.185762	5323.77	2584.3	2.06005	1.04268	-2.87007	0.00714181	0.0473718	Lipid metabolism	Fatty amide metabolism, endocannabinoid	ANPNEG	C12272	NA	105955-11-1	NA	NA	NA	NA	NA
311.1092@0.88??	0.427328	0.487342	0.0872279	0.140683	92842	46046	2.01629	1.0117	-4.46215	8.55121e-05	0.00334073	NA	NA	NA	NA	NA	NA	NA	NA	NA	NA	NA
SM(d18:1/18:0)	0.750129	0.914253	0.15312	0.263922	282726	148798	1.90007	0.926053	-3.61779	0.00171962	0.0200529	Lipid metabolism	Sphingolipid /ceramide metabolism	ANPPOS	NA	NA	NA	NA	NA	NA	NA	NA
SM(d16:1/24:1(15Z))	0.636561	0.707622	0.129938	0.204273	106182	58441.2	1.8169	0.861483	-3.12814	0.00451764	0.0362917	Lipid metabolism	Sphingolipid /ceramide metabolism	ANPPOS	NA	NA	NA	NA	NA	NA	NA	NA
Ketoleucine	0.52138	0.364753	0.106426	0.105295	85791.3	49580.2	1.73035	0.791067	-3.55833	0.00118267	0.0155467	Amino acids	Valine, Leucine, and Isoleucine metabolism	ANPNEG	C00233	HMDB00695	816-66-0	Organic acids	Carboxylic acids	2-Oxocarboxylic acids	none	none
Sphingomyelin	0.713648	0.806161	0.145673	0.232719	740415	434110	1.70559	0.770274	-3.10823	0.00555681	0.0406018	Lipid metabolism	Sphingolipid /ceramide metabolism	ANPPOS	C00550	HMDB01348	85187-10-6	Lipids	Sphingolipids	Phosphosphingolipids	Ceramide phosphocholines (sphingomyelins)	none
SM(d18:0/18:1(11Z))	0.713641	0.806152	0.145671	0.232716	740392	434109	1.70555	0.770233	-3.10802	0.00555959	0.0406018	Lipid metabolism	Sphingolipid /ceramide metabolism	ANPPOS	NA	NA	NA	NA	NA	NA	NA	NA
3-Methy2-Oxopentanoic Acid	0.508977	0.294378	0.103895	0.0849796	101119	59731.1	1.69291	0.759506	-3.72422	0.000768524	0.0114163	Amino acids	Valine, Leucine, and Isoleucine metabolism	ANPNEG	C00671	HMDB00491	1460-34-0	Lipids	Fatty acyls	Fatty Acids and Conjugates	Branched fatty acids	none
4-Pyridoxic Acid	0.531383	0.394335	0.108468	0.113835	32386	19407.4	1.66875	0.738766	-3.61019	0.000984652	0.0139589	Cofactor, vitamin and antioxidant metabolism	Vitamin B6 Metabolism	ANPNEG/ANPPOS	C00847	HMDB00017	82-82-6	Vitamins and Cofactors	Vitamins	Water-soluble vitamins	none	none
Homovanillic Acid	0.431943	0.29007	0.08817	0.0837361	306828	196142	1.56432	0.645532	-3.70729	0.00076946	0.0114163	Amino acids	Tyrosine/phenylalanine metabolism	ANPNEG	C05582	HMDB00118	306-08-1	NA	NA	NA	NA	NA
Xanthurenic Acid	0.405474	0.4428	0.0827671	0.127825	14954	9810.03	1.52436	0.608201	-3.49675	0.0013807	0.0172112	Amino acids	Tryptophan metabolism	ANPNEG	C02470	HMDB00881	59-00-7	NA	NA	NA	NA	NA
3-Amino-5-Hydroxybenzoic Acid	0.374696	0.182452	0.0764845	0.0526694	33217.7	22472.3	1.47816	0.563804	-4.10859	0.000260408	0.00570531	Others	Biosynthesis of ansamycinc (antibiotics)	ANPNEG	NA	NA	76045-71-1	NA	NA	NA	NA	NA
Ophthalmic Acid	0.368759	0.191129	0.0752727	0.0551743	56605.2	39445	1.43504	0.521093	-2.98261	0.00564459	0.0408104	Cofactor, vitamin and antioxidant metabolism	Glutathione metabolism	ANPNEG/ANPPOS	NA	HMDB05765	495-27-2	NA	NA	NA	NA	NA
Leucine	0.344069	0.368021	0.0702328	0.106239	7996452	5813992	1.37538	0.459831	-2.95965	0.00605391	0.0420863	Amino acids	Valine, Leucine, and Isoleucine metabolism	ANPNEG/ANPPOS	C00123	HMDB00687	328-39-2	Peptides	Amino acids	Common amino acids	none	none
Isoleucine	0.343056	0.368023	0.070026	0.106239	8032481	5841275	1.37512	0.459562	-2.96243	0.00601512	0.0420863	Amino acids	Valine, Leucine, and Isoleucine metabolism	ANPNEG/ANPPOS	C00407	HMDB00172	73-32-5	Peptides	Amino acids	Common amino acids	none	none
O-Acetylserine	0.230181	0.128329	0.0469855	0.0370453	799859	628982	1.27167	0.346727	-4.49586	7.71826e-05	0.00334073	Amino acids	Cysteine and Methionine metabolism	ANPNEG/ANPPOS	C00979	HMDB03011	5147-00-2	Peptides	Amino acids	none	none	none
Guanidinoacetic Acid	0.290756	0.120575	0.0593502	0.0348069	707434	576921	1.22622	0.294222	-3.10083	0.0039582	0.034266	Amino acids	Glycine, serine, and threonine metabolism	ANPNEG/ANPPOS	C00581	HMDB00128	352-97-6	Peptides	Amino acids	none	none	none
AIR	0.197942	0.0804549	0.0404047	0.0232253	79817.8	69587.1	1.14702	0.197891	-3.1926	0.00307254	0.02885	Purine and pyrimidine metabolism/nucleotide metabolism	Purine metabolism	ANPNEG/ANPPOS	C03373	HMDB01235	NA	NA	NA	NA	NA	NA
2-Hexenoylcarnitine	0.127681	0.139337	0.0260628	0.0402231	193056	248182	0.777882	-0.362377	4.77352	0.000170165	0.00440864	Lipid metabolism	Carnitine metabolism	ANPPOS	NA	NA	NA	NA	NA	NA	NA	NA
3-Phosphoglyceroinositol	0.314638	0.181533	0.0642253	0.052404	6081056	7833341	0.776304	-0.365306	3.21082	0.003459	0.0308748	Lipid metabolism	Glycerophospholipid metabolism	ANPNEG	C01225	HMDB11649	NA	NA	NA	NA	NA	NA
Stachyose Hydrate	0.460162	0.22884	0.0939302	0.0660604	199960	276385	0.723482	-0.46697	2.85336	0.00764297	0.0489015	Carbohydrate metabolism	Galactose metabolism	ANPNEG	C01613	HMDB03553	10094-58-3	NA	NA	NA	NA	NA
2-Aminobutyric Acid	0.207874	0.173497	0.0424321	0.0500842	139631	193132	0.722983	-0.467967	4.91298	8.46873e-05	0.00334073	Amino acids	Cysteine and Methionine metabolism	ANPNEG	C02356	HMDB00452	1492-24-6	Lipids	Fatty acyls	Fatty Acids and Conjugates	Amino fatty acids	none
PC(14:1(9Z)/22:2(13Z,16Z))	0.25387	0.352453	0.051821	0.101744	9460348	13502334	0.700645	-0.513244	3.36582	0.00435779	0.0358032	Lipid metabolism	Glycerophospholipid metabolism	ANPPOS	NA	NA	NA	NA	NA	NA	NA	NA
PC(34:2)	0.283646	0.313949	0.0578989	0.0906292	19413287	27780952	0.698798	-0.517052	3.49809	0.00280869	0.0270758	Lipid metabolism	Glycerophospholipid metabolism	ANPPOS	C00157	HMDB08004	8002-43-5	Lipids	Glycerophospholipids	Glycerophosphocholines	Diacylglycerophosphocholines	none
838.5522@6.45	0.341368	0.249048	0.0696814	0.071894	27076.5	40064.6	0.675822	-0.565286	3.92367	0.000773719	0.0114163	NA	Likely addducts of phospholipids	ANPNEG	NA	NA	NA	NA	NA	NA	NA	NA
1-Methylnicotinamide	0.474606	0.250603	0.0968786	0.0723429	3992.8	6037.89	0.661292	-0.596641	3.42022	0.00171551	0.0200529	Cofactor, vitamin and antioxidant metabolism	Nicotinate and nicotinamide metabolism	ANPPOS	C02918	HMDB01464	6456-44-6	NA	NA	NA	NA	NA
Hypotaurine	0.221586	0.199631	0.0452311	0.0576284	379515	574854	0.660194	-0.599038	5.46795	3.95344e-05	0.00233823	Amino acids	Taurine and hypotaurine metabolism	ANPPOS	C00519	HMDB00965	300-84-5	NA	NA	NA	NA	NA
910.5647@6.38	0.654904	0.328943	0.133682	0.0949577	42317.9	64888.6	0.652163	-0.616696	3.09253	0.00526161	0.0392179	NA	Likely addducts of phospholipids	ANPNEG	NA	NA	NA	NA	NA	NA	NA	NA
N-Acetylglycine	0.411716	0.305172	0.0840411	0.0880956	126215	195054	0.64708	-0.627984	3.82986	0.00113628	0.0152135	Amino acids	Amino acid modification	ANPNEG/ANPPOS	NA	HMDB00532	543-24-8	NA	NA	NA	NA	NA
PS(16:0/18:2(9Z,12Z))	0.511536	0.350278	0.104417	0.101117	841759	1.31746e+06	0.638926	-0.646279	3.5156	0.00214727	0.0235224	Lipid metabolism	Glycerophospholipid metabolism	ANPNEG	NA	NA	NA	NA	NA	NA	NA	NA
PI(16:0/16:1(9Z))	0.402226	0.366079	0.0821041	0.105678	1100543	1725355	0.637865	-0.648678	3.25256	0.00513135	0.0389846	Lipid metabolism	Glycerophospholipid metabolism	ANPNEG	NA	NA	NA	NA	NA	NA	NA	NA
Butyric Acid	0.550546	0.350096	0.11238	0.101064	8900.41	14113.4	0.630636	-0.665122	3.10388	0.00486059	0.0373852	Butyrate metabolism	Butyrate metabolism	ANPNEG	C00246	HMDB00039	107-92-6	Lipids	Fatty acyls	Fatty Acids and Conjugates	Straight chain fatty acids	none
PC(14:0/20:4(5Z,8Z,11Z,14Z))	0.20471	0.353164	0.0417862	0.10195	390433	623507	0.626188	-0.675333	4.61738	0.000435379	0.00786947	Lipid metabolism	Glycerophospholipid metabolism	ANPPOS	NA	NA	NA	NA	NA	NA	NA	NA
PS(16:0/22:6(4Z,7Z,10Z,13Z,16Z,19Z))	0.437995	0.392545	0.0894054	0.113318	1565480	2500089	0.62617	-0.675374	3.07705	0.00758406	0.0489015	Lipid metabolism	Glycerophospholipid metabolism	ANPNEG	NA	NA	NA	NA	NA	NA	NA	NA
PS(16:0/20:3(8Z,11Z,14Z))	0.510381	0.346944	0.104181	0.100154	772098	1.23607e+06	0.624641	-0.6789	3.61377	0.00194333	0.022302	Lipid metabolism	Glycerophospholipid metabolism	ANPNEG	NA	NA	NA	NA	NA	NA	NA	NA
PI(16:0/16:2(9Z,12Z))	0.442581	0.396033	0.0903415	0.114325	1036770	1680478	0.616949	-0.696776	3.13462	0.00678626	0.0454302	Lipid metabolism	Glycerophospholipid metabolism	ANPNEG	NA	NA	NA	NA	NA	NA	NA	NA
791.564@6.69	0.377545	0.257267	0.0770661	0.0742665	235800	389470	0.605436	-0.723953	4.60536	0.000168896	0.00440864	NA	Likely addducts of phospholipids	ANPNEG	NA	NA	NA	NA	NA	NA	NA	NA
2-Aminoadipic Acid	0.302049	0.338948	0.0616555	0.0978459	266418	442444	0.602152	-0.731801	3.98631	0.00142686	0.0174851	Amino acids	Lysine degradation	ANPPOS	C00956	HMDB00510	542-32-5	Peptides	none	none	none	none
800.5609@6.61	0.476646	0.374832	0.097295	0.108205	13459.8	22405.7	0.600732	-0.735208	3.50339	0.00228404	0.0239124	NA	Likely addducts of phospholipids	ANPNEG	NA	NA	NA	NA	NA	NA	NA	NA
N-Carbamoyaspartic Acid	0.565147	0.377327	0.11536	0.108925	3751297	6254005	0.599823	-0.737391	3.28895	0.00420878	0.0349764	Purine and pyrimidine metabolism/nucleotide metabolism	Pyrimidine metabolism	ANPNEG	C00438	HMDB00828	13184-27-5	NA	NA	NA	NA	NA
PS(18:1(9Z)/20:4(5Z,8Z,11Z,14Z))	0.492762	0.365039	0.100585	0.105378	748380	1.25241e+06	0.59755	-0.742868	3.60688	0.00231517	0.0239124	Lipid metabolism	Glycerophospholipid metabolism	ANPNEG	NA	NA	NA	NA	NA	NA	NA	NA
UDP-N-Acetylglucosamine	0.80189	0.258156	0.163685	0.0745231	52456888	87964564	0.596341	-0.74579	3.19338	0.0031555	0.0288788	Amino sugar and nucleotide sugar metabolism	Nucleotide sugar metabolism	ANPNEG/ANPPOS	C00043	HMDB00290	91183-98-1	Carbohydrates	Monosaccharides	Amino sugars	none	none
UDP-N-acetygalactosamine	0.806514	0.258528	0.164629	0.0746305	52189197	87627116	0.595583	-0.747626	3.19402	0.00315037	0.0288788	Amino sugar and nucleotide sugar metabolism	Nucleotide sugar metabolism	ANPNEG/ANPPOS	C00203	HMDB60522	108320-87-2	NA	NA	NA	NA	NA
PC(14:0/18:2(9Z,12Z))	0.266873	0.308067	0.0544752	0.0889311	1281477	2172708	0.589806	-0.761687	5.50959	5.01397e-05	0.00258936	Lipid metabolism	Glycerophospholipid metabolism	ANPPOS	NA	NA	NA	NA	NA	NA	NA	NA
Glutamic Acid	0.253808	0.187868	0.0518083	0.0542327	21560935	36765386	0.586447	-0.769928	7.48718	3.32173e-07	6.00403e-05	Amino acids	Alanine, Aspartate, and Glutamate metabolism	ANPNEG/ANPPOS	C00025	HMDB00148	56-86-0	Peptides	Amino acids	Common amino acids	none	none
dTDP-Glucose	1.09021	0.272122	0.222538	0.0785547	172063	293609	0.586026	-0.770963	3.6301	0.00106366	0.0147889	Amino sugar and nucleotide sugar metabolism	Nucleotide sugar metabolism	ANPNEG	C00842	HMDB01328	2196-62-5	NA	NA	NA	NA	NA
N-Methylglutamic Acid	0.394973	0.376057	0.0806236	0.108558	430531	739642	0.58208	-0.78071	3.29868	0.00466282	0.0363066	Amino acids	Amino acid modification	ANPNEG	C01046	NA	35989-16-3	NA	NA	NA	NA	NA
4-Hydroxy-Proline	0.227518	0.195735	0.046442	0.056504	376444	656327	0.573561	-0.801981	6.60357	4.27678e-06	0.000386514	Amino acids	Arginine and Proline metabolism	ANPNEG/ANPPOS	C01157	NA	2584-71-6	Peptides	Amino acids	Other amino acids	none	none
Dimethylglycine	0.249609	0.199022	0.0509513	0.0574526	652074	1.13714e+06	0.573435	-0.802299	7.56257	4.22514e-07	6.10955e-05	Amino acids	Glycine, serine, and threonine metabolism	ANPNEG/ANPPOS	C01026	HMDB00092	1118-68-9	NA	NA	NA	NA	NA
PE(14:0/18:2(9Z,12Z))	0.548715	0.451697	0.112006	0.130394	17818.6	31248.4	0.570224	-0.810399	3.55836	0.00236986	0.0241325	Lipid metabolism	Glycerophospholipid metabolism	ANPNEG	NA	NA	NA	NA	NA	NA	NA	NA
3'-Sialyllactose	0.270271	0.332261	0.0551689	0.0959154	48784.2	86214.2	0.565849	-0.82151	4.10438	0.00122199	0.0157233	Carbohydrate metabolism	Carbohydrates	ANPNEG	NA	HMDB00825	35890-38-1	NA	NA	NA	NA	NA
PE(18:4(6Z,9Z,12Z,15Z)/24:1(15Z))	0.476712	0.441497	0.0973083	0.127449	40191.8	73235.1	0.548806	-0.865633	3.61374	0.00243073	0.0242246	Lipid metabolism	Glycerophospholipid metabolism	ANPNEG	NA	NA	NA	NA	NA	NA	NA	NA
819.5948@6.62	0.337028	0.320283	0.0687956	0.0924577	566258	1035025	0.547096	-0.870134	4.83273	0.000204676	0.00477358	NA	Likely addducts of phospholipids	ANPNEG	NA	NA	NA	NA	NA	NA	NA	NA
ADP	0.664276	0.206509	0.135595	0.0596139	898486	1653321	0.543443	-0.8798	4.20093	0.000182931	0.00440864	Purine and pyrimidine metabolism/nucleotide metabolism	Purine metabolism	ANPNEG/ANPPOS	C00008	HMDB01341	58-64-0	Nucleic acids	Nucleotides	Ribonucleotides	none	none
3-Hydroxyglutaric Acid	0.326601	0.30418	0.0666672	0.0878091	1127894	2076307	0.543221	-0.880388	4.92398	0.000153551	0.00440864	Amino acids	Alanine, Aspartate, and Glutamate metabolism	ANPNEG	NA	HMDB00428	NA	NA	NA	NA	NA	NA
5'-CMP	0.675173	0.356155	0.137819	0.102813	40583.3	75563.1	0.537078	-0.896796	3.18616	0.00517638	0.0389846	Purine and pyrimidine metabolism/nucleotide metabolism	Pyrimidine metabolism	ANPNEG/ANPPOS	C00055	HMDB00095	63-37-6	Nucleic acids	Nucleotides	Ribonucleotides	none	none
PC(18:3(6Z,9Z,12Z)/24:1(15Z))	0.565957	0.50583	0.115526	0.146021	13394.4	24948.2	0.536887	-0.897309	3.30551	0.00391625	0.034266	Lipid metabolism	Glycerophospholipid metabolism	ANPPOS	NA	NA	NA	NA	NA	NA	NA	NA
N-Acetylaspartic Acid	0.318813	0.241215	0.0650774	0.0696327	14746316	27826861	0.529931	-0.916124	5.65064	2.41664e-05	0.00174723	Amino acids	Alanine, Aspartate, and Glutamate metabolism	ANPNEG	C01042	HMDB00812	997-55-7	Peptides	Amino acids	none	none	none
935.5823@6.37	0.449111	0.427905	0.0916743	0.123526	26680.8	50559.7	0.527708	-0.922187	4.16732	0.000618294	0.00993393	NA	Likely addducts of phospholipids	ANPNEG	NA	NA	NA	NA	NA	NA	NA	NA
Adenine	0.412321	0.49469	0.0841646	0.142805	1409206	2706524	0.52067	-0.941559	3.46278	0.0039828	0.034266	Purine and pyrimidine metabolism/nucleotide metabolism	Purine metabolism	ANPPOS	C00147	HMDB01384	73-24-5	Nucleic acids	Bases	Purines	none	none
N-Acetylmethionine	0.361023	0.29361	0.0736935	0.084758	337695	650593	0.519058	-0.946034	5.46827	5.58515e-05	0.00269204	Amino acids	Amino acid modification	ANPNEG/ANPPOS	C02712	HMDB11745	1115-47-5	NA	NA	NA	NA	NA
2-Methylmalate	0.355905	0.348877	0.0726488	0.100712	1064778	2090443	0.509355	-0.973256	4.734	0.000294702	0.0062591	Others	Microbial metabolite, Carboxylic Acids and Derivatives	ANPNEG	C00815	HMDB00426	2306-22-1	NA	NA	NA	NA	NA
N-Acetydserine	127.575	109.214	26.0411	31.5273	995102	1958957	0.507975	-0.977169	3.27666	0.00467015	0.0363066	Amino acids	Amino acid modification	ANPNEG/ANPPOS	NA	HMDB02931	97-14-3	NA	NA	NA	NA	NA
5-Hydroxyindoleacetic Acid	0.354145	0.29421	0.0722896	0.0849311	328973	649903	0.506188	-0.982254	5.65422	4.20428e-05	0.00233823	Amino acids	Tryptophan metabolism	ANPNEG	C05635	HMDB00763	54-16-0	Bioactive peptides	Neurotransmitters	none	none	none
PC(18:4(6Z,9Z,12Z,15Z)/24:1(15Z))	0.36344	0.549975	0.074187	0.158764	68603.9	136457	0.502751	-0.992083	3.82491	0.00204331	0.0230671	Lipid metabolism	Glycerophospholipid metabolism	ANPPOS	NA	NA	NA	NA	NA	NA	NA	NA
PC(20:0/22:6(4Z,7Z,10Z,13Z,16Z,19Z))	0.396898	0.539925	0.0810165	0.155863	121028	241926	0.500269	-0.999225	3.727	0.00244592	0.0242246	Lipid metabolism	Glycerophospholipid metabolism	ANPPOS	NA	NA	NA	NA	NA	NA	NA	NA
Citraconic Acid	0.448873	0.557391	0.0916259	0.160905	166888	335022	0.498141	-1.00537	3.22927	0.00623096	0.0429046	Amino acids	Valine, Leucine, and Isoleucine metabolism	ANPNEG	C02226	HMDB00634	498-23-7	NA	NA	NA	NA	NA
Oxoglutaric Acid	0.622624	0.585618	0.127093	0.169053	1629019	3310884	0.492019	-1.02321	3.63139	0.00224715	0.0238924	Energy metabolism	Citrate cycle (TCA cycle)	ANPNEG	C00026	HMDB00208	328-50-7	Organic acids	Carboxylic acids	2-Oxocarboxylic acids	none	none
763.5331@6.76	0.394658	0.279717	0.0805592	0.0807475	15457.8	31679.1	0.487949	-1.0352	6.06593	1.60123e-05	0.00128633	NA	Likely addducts of phospholipids	ANPNEG	NA	NA	NA	NA	NA	NA	NA	NA
Thiamine Pyrophosphate?? Isomer	76.4372	0.304808	15.6027	0.0879905	53860.1	110530	0.487288	-1.03715	4.01018	0.000341778	0.00667087	Cofactor, vitamin and antioxidant metabolism	Thiamine metabolism	ANPNEG/ANPPOS	C00068	HMDB01372	154-87-0	Vitamins and Cofactors	Cofactors	Coenzymes	none	none
851.4939@6.51	0.379921	0.421143	0.077551	0.121573	28484.1	58503.2	0.486881	-1.03836	4.21767	0.00096603	0.0139589	NA	Likely addducts of phospholipids	ANPNEG	NA	NA	NA	NA	NA	NA	NA	NA
GMP	0.888619	0.490704	0.181389	0.141654	23645.2	49629.2	0.476438	-1.06964	3.49537	0.00278433	0.0270758	Purine and pyrimidine metabolism/nucleotide metabolism	Purine metabolism	ANPNEG/ANPPOS	C00144	HMDB01397	85-32-5	Nucleic acids	Nucleotides	Ribonucleotides	none	none
Methylenesuccinic Acid	0.478015	0.611409	0.0975745	0.176499	137382	291546	0.471219	-1.08553	3.16601	0.00737185	0.0480167	Energy metabolism	Citrate cycle (TCA cycle)	ANPNEG	C00490	HMDB02092	97-65-4	NA	NA	NA	NA	NA
2-Aminoisobutyric Acid	0.388305	0.605226	0.0792623	0.174714	671550	1.48465e+06	0.45233	-1.14455	3.27898	0.00648179	0.0442107	Others	Nonprotein amino acid	ANPNEG	C03665	HMDB01906	62-57-7	NA	NA	NA	NA	NA
Galactose	174.291	108.514	35.577	31.3253	81765.4	185263	0.441348	-1.18001	3.09873	0.00724825	0.0476407	Carbohydrate metabolism	Galactose metabolism	ANPNEG	C01582	HMDB00143	59-23-4	NA	NA	NA	NA	NA
LysoPE(0:0/18:1(11Z))	0.834801	0.873857	0.170403	0.252261	310224	736943	0.420961	-1.24824	3.05768	0.00777791	0.0493283	Lipid metabolism	Glycerophospholipid metabolism	ANPNEG	NA	NA	NA	NA	NA	NA	NA	NA
PE(16:0/P-18:0)	0.511607	0.638031	0.104431	0.184184	18250.7	43875.7	0.415964	-1.26547	4.18323	0.00108566	0.01481	Lipid metabolism	Glycerophospholipid metabolism	ANPNEG	NA	NA	NA	NA	NA	NA	NA	NA
UDP-Glucose	0.868207	0.31948	0.177222	0.0922259	16753344	40802379	0.410597	-1.2842	4.45399	0.000180767	0.00440864	Amino sugar and nucleotide sugar metabolism	Nucleotide sugar metabolism	ANPNEG	C00029	HMDB00286	133-89-1	Vitamins and Cofactors	Cofactors	Coenzymes	none	none
UDP-Galactose	0.869271	0.319602	0.177439	0.0922611	16730025	40767701	0.410375	-1.28499	4.45446	0.000180454	0.00440864	Amino sugar and nucleotide sugar metabolism	Nucleotide sugar metabolism	ANPNEG	C00052	HMDB00302	2956-16-3	NA	NA	NA	NA	NA
PC(14:0/14:0)	0.449803	0.563292	0.0918157	0.162608	227587	572695	0.397397	-1.33135	5.29459	0.00014696	0.00440864	Lipid metabolism	Glycerophospholipid metabolism	ANPPOS	NA	NA	NA	NA	NA	NA	NA	NA
LysoPE(0:0/16:0)	0.858428	0.921814	0.175226	0.266105	445367	1.13982e+06	0.390735	-1.35574	3.21327	0.00576328	0.041256	Lipid metabolism	Glycerophospholipid metabolism	ANPNEG	NA	NA	NA	NA	NA	NA	NA	NA
Linolenyl Carnitine	0.782841	0.562945	0.159797	0.162508	18703.1	48047.2	0.389265	-1.36117	3.32585	0.00446489	0.036271	Lipid metabolism	Carnitine metabolism	ANPPOS	NA	HMDB06318	NA	NA	NA	NA	NA	NA
PC(18:1(11Z)/22:2(13Z,16Z))	0.723415	0.417464	0.147666	0.120511	15639	40312.3	0.387947	-1.36607	4.90814	0.000250638	0.00566284	Lipid metabolism	Glycerophospholipid metabolism	ANPPOS	NA	NA	NA	NA	NA	NA	NA	NA
5-Aminolevulinic Acid	0.501866	0.500948	0.102443	0.144611	1783194	4773092	0.373593	-1.42046	4.5246	0.000497948	0.00857182	Porphyrin metabolism	Heme/porphyrin synthesis	ANPPOS	C00430	HMDB01149	106-60-5	NA	NA	NA	NA	NA
LysoPE(0:0/24:6(6Z,9Z,12Z,15Z,18Z,21Z))	1.04559	0.670927	0.21343	0.19368	42983.8	118420	0.362977	-1.46205	3.70055	0.0020738	0.0230671	Lipid metabolism	Glycerophospholipid metabolism	ANPNEG	NA	NA	NA	NA	NA	NA	NA	NA
PS(14:0/14:0)	0.762171	0.763217	0.155577	0.220322	41410.3	114238	0.362491	-1.46398	3.17697	0.00678588	0.0454302	Lipid metabolism	Glycerophospholipid metabolism	ANPNEG	NA	NA	NA	NA	NA	NA	NA	NA
Cysteineglutathione Disulfide	0.672313	0.476241	0.137235	0.137479	132080	369604	0.357355	-1.48457	3.46839	0.00402851	0.034266	Cofactor, vitamin and antioxidant metabolism	Glutathione metabolism	ANPPOS	NA	HMDB00656	NA	NA	NA	NA	NA	NA
Creatine	0.556127	0.575081	0.113519	0.166011	1674652	5071556	0.330205	-1.59857	4.47696	0.000616909	0.00993393	Amino acids	Glycine, serine, and threonine metabolism	ANPPOS	C00300	HMDB00064	57-00-1	NA	NA	NA	NA	NA
LysoPE(0:0/20:2(11Z,14Z))	76.3067	0.942292	15.576	0.272016	44383.8	136324	0.325575	-1.61894	3.52493	0.00296206	0.0281785	Lipid metabolism	Glycerophospholipid metabolism	ANPNEG	NA	NA	NA	NA	NA	NA	NA	NA
N-Acetydglutamic Acid	0.316738	0.340132	0.0646539	0.0981876	612742	2.013e+06	0.304392	-1.716	6.46427	3.48054e-05	0.00228767	Amino acids	Arginine and Proline metabolism	ANPNEG	C00624	HMDB01138	1188-37-0	Peptides	Amino acids	none	none	none
LysoPE(0:0/20:1(11Z))	105.347	0.901984	21.5039	0.26038	23105.4	78523.3	0.294249	-1.76489	3.71302	0.00218325	0.0235596	Lipid metabolism	Glycerophospholipid metabolism	ANPNEG	NA	NA	NA	NA	NA	NA	NA	NA
LysoPE(0:0/14:0)	184.563	1.30408	37.6738	0.376455	14276.7	54070.8	0.264038	-1.92118	3.52929	0.00333265	0.0301189	Lipid metabolism	Glycerophospholipid metabolism	ANPNEG	NA	NA	NA	NA	NA	NA	NA	NA
849.6172@7.51	0.924928	0.595432	0.1888	0.171886	64188.9	256096	0.250644	-1.99629	4.62311	0.000532464	0.00895282	NA	Likely addducts of phospholipids	ANPNEG	NA	NA	NA	NA	NA	NA	NA	NA
Glycosylhistidine	164.992	0.500098	33.6789	0.144366	12021.9	57808.2	0.207962	-2.26561	5.09946	0.000145063	0.00440864	Amino acids	Maillard-Reation-like dry-down artefact?	ANPNEG/ANPPOS	NA	NA	NA	NA	NA	NA	NA	NA
NADP	189.861	0.636329	38.7551	0.183692	7482.49	42392.3	0.176506	-2.50221	4.321	0.000673699	0.0105888	Cofactor, vitamin and antioxidant metabolism	Nicotinate and nicotinamide metabolism	ANPNEG/ANPPOS	C00006	HMDB00217	53-59-8	Vitamins and Cofactors	Cofactors	Coenzymes	none	none
