# Supplementary material for: Embryonic Hypotaurine Levels Contribute to Strain-Dependent Susceptibility in Mouse Models of Valproate-Induced Neural Tube Defects
Source: Front Cell Dev Biol. 2022 Feb 21;10:832492. doi: 10.3389/fcell.2022.832492 (PMC8898900; doi:10.3389/fcell.2022.832492)
Supplement: Supplementary file 6 [file Table1.XLSX]

## Sheet: Sheet1
Metabolite	VPA.stdev	Control.stdev	VPA.std.err	Control.std.err	VPA.mean	Control.mean	Fold_Change	log2FoldChange	t_value	pval	padj	SuperPathway	SubPathway	LCMS.Mode	KEGG	HMP	CAS.ID	Class	Subclass_1	Subclass_2	Subclass_3	Subclass_4
5-OH-Valproic acid	0.726332	147.833	0.0988412	28.4506	740923	34527	21.4593	4.42353	-12.0277	3.0529e-17	1.10362e-14	Drug metabolism	Valproic acid metabolism	ANPNEG	NA	NA	NA	NA	NA	NA	NA	NA
4-OH-Valproic acid	0.623062	0.415952	0.0847879	0.0800499	284799	13914.1	20.4684	4.35533	-12.3781	2.66294e-17	1.10362e-14	Drug metabolism	Valproic acid metabolism	ANPNEG	NA	NA	NA	NA	NA	NA	NA	NA
Corticosterone	180.614	98.9575	24.5784	19.0444	705.287	80.6584	8.74412	3.12831	-4.64252	1.52495e-05	0.000344544	Lipid metabolism	Steroid metabolism	ANPNEG/ANPPOS	C02140	HMDB01547	50-22-6	Lipids	Sterol Lipids	Steroids	C21 steroids (gluco/mineralocorticoids, progestogens) and derivatives	none
Homocysteine	126.366	157.061	17.1962	30.2265	15099.3	1740.34	8.67606	3.11704	-4.08011	0.000143102	0.00197873	Amino acids	Cysteine and Methionine metabolism	ANPPOS	C00155	HMDB00742	454-29-5	Peptides	Amino acids	Other amino acids	none	none
LysoPC(15:0)	171.971	183.339	23.4022	35.2837	33900.7	9053.59	3.74444	1.90475	-2.57141	0.0122763	0.0481781	Lipid metabolism	Glycerophospholipid metabolism	ANPPOS	NA	NA	NA	NA	NA	NA	NA	NA
2-Hydroxybutyric acid	0.596361	0.890884	0.0811545	0.171451	360784	106823	3.3774	1.75591	-10.4323	2.16863e-16	5.22639e-14	Amino acids	Cysteine and Methionine metabolism	ANPNEG	C05984	HMDB00008	600-15-7	Lipids	Fatty acyls	Fatty Acids and Conjugates	Hydroxy fatty acids	none
S-Adenosylhomocysteine (SAH)	1.21914	0.941074	0.165904	0.18111	148788	49960.6	2.97811	1.57439	-3.11411	0.00276578	0.0162662	Amino acids	Cysteine and Methionine metabolism	ANPNEG/ANPPOS	C00021	HMDB00939	979-92-0	NA	NA	NA	NA	NA
Melilotate	133.753	147.206	18.2015	28.3299	11465.2	4278.43	2.67976	1.42211	-4.76639	8.67303e-06	0.000250824	Amino acids	Phenylalanine metabolism	ANPNEG	C01198	HMDB33752	495-78-3	NA	NA	NA	NA	NA
Glucuronic Acid	0.413431	0.23773	0.0562608	0.0457511	800119	304260	2.62972	1.39491	-6.04343	1.33739e-07	9.66932e-06	Energy metabolism	Pentose phosphate pathway	ANPNEG	C00333	HMDB02545	685-73-4	Carbohydrates	Monosaccharides	Sugar acids	none	none
Hydroxyisobutyric Acid	0.916161	1.3369	0.124674	0.257287	429734	164425	2.61356	1.38602	-3.85156	0.000244416	0.00315559	Others	Methyl tert-butyl ether (MTBE) metabolite	ANPNEG	NA	HMDB00729	594-61-6	NA	NA	NA	NA	NA
Valeric Acid	0.676274	0.654167	0.0920292	0.125895	37104.9	14668.8	2.52951	1.33886	-5.1023	2.75466e-06	0.000114063	Lipid metabolism	Fatty acid metabolism	ANPNEG	C00803	HMDB00892	109-52-4	Lipids	Fatty acyls	Fatty Acids and Conjugates	Straight chain fatty acids	none
3-Methyl Butanoic Acid	0.675441	0.691762	0.0919159	0.13313	41192	17271.5	2.38496	1.25397	-5.00168	3.72477e-06	0.000122409	Others	N/A	ANPNEG	NA	HMDB33890	NA	NA	NA	NA	NA	NA
PS(14:1(9Z)/18:3(9Z,12Z,15Z))	0.889211	172.801	0.121006	33.2556	3871.82	1635.92	2.36676	1.24291	-3.5092	0.000754729	0.00708661	Lipid metabolism	Glycerophospholipid metabolism	ANPNEG	NA	NA	NA	NA	NA	NA	NA	NA
DG(14:1n5/0:0/18:2n6)	0.635442	0.862521	0.0864727	0.165992	44764.8	19017.6	2.35386	1.23503	-5.60093	3.68696e-07	2.22139e-05	Lipid metabolism	Glycerophospholipid metabolism	ANPNEG	NA	NA	NA	NA	NA	NA	NA	NA
PC(20:1(11Z)/P-18:1(11Z))	1.01173	71.4906	0.137678	13.7584	5591.42	2418.35	2.31208	1.20919	-2.81064	0.00670442	0.0294121	Lipid metabolism	Glycerophospholipid metabolism	ANPPOS	NA	NA	NA	NA	NA	NA	NA	NA
PE(18:2(9Z,12Z)/22:6(4Z,7Z,10Z,13Z,16Z,19Z))	51.1986	1.27064	6.96725	0.244535	331701	178680	1.85639	0.892502	-3.40409	0.00118407	0.00898486	Lipid metabolism	Glycerophospholipid metabolism	ANPNEG	NA	NA	NA	NA	NA	NA	NA	NA
4-Hydroxy-3-Methoxyphenylglycol	0.574201	0.473616	0.0781389	0.0911474	796459	449896	1.77032	0.824008	-4.47196	2.57533e-05	0.000517212	Amino acids	Tyrosine/phenylalanine metabolism	ANPNEG	C05594	NA	67423-45-4	NA	NA	NA	NA	NA
Ketoleucine	0.490857	0.435916	0.0667971	0.0838921	73684.9	42321.3	1.74108	0.799985	-5.01098	3.2537e-06	0.000114063	Amino acids	Valine, Leucine, and Isoleucine metabolism	ANPNEG	C00233	HMDB00695	816-66-0	Organic acids	Carboxylic acids	2-Oxocarboxylic acids	none	none
SM(d18:0/20:0)	70.8544	98.9978	9.64206	19.0521	3209.76	1843.99	1.74067	0.79964	-2.93391	0.00464893	0.0231805	Lipid metabolism	Sphingolipid /ceramide metabolism	ANPPOS	NA	NA	NA	NA	NA	NA	NA	NA
3-Methy2-Oxopentanoic Acid	0.487866	0.40944	0.0663902	0.0787967	86478.6	50858.8	1.70036	0.765844	-5.07168	2.55956e-06	0.000114063	Amino acids	Valine, Leucine, and Isoleucine metabolism	ANPNEG	C00671	HMDB00491	1460-34-0	Lipids	Fatty acyls	Fatty Acids and Conjugates	Branched fatty acids	none
PE(14:1(9Z)/24:1(15Z))	50.7885	71.7248	6.91144	13.8034	14544.2	8697.62	1.6722	0.74175	-3.22451	0.00184142	0.0121031	Lipid metabolism	Glycerophospholipid metabolism	ANPNEG	NA	NA	NA	NA	NA	NA	NA	NA
N-Oleoyl Dopamine (OLDA)	0.704207	71.5308	0.0958304	13.7661	5218.64	3242.95	1.60923	0.686368	-2.90589	0.00485612	0.0237228	Lipid metabolism	Fatty amide metabolism, endocannabinoid	ANPNEG	C12272	NA	105955-11-1	NA	NA	NA	NA	NA
4-Pyridoxic Acid	0.48026	0.521278	0.0653551	0.10032	32730.5	20942.4	1.56288	0.644209	-4.20508	8.25154e-05	0.00126933	Cofactor, vitamin and antioxidant metabolism	Vitamin B6 Metabolism	ANPNEG/ANPPOS	C00847	HMDB00017	82-82-6	Vitamins and Cofactors	Vitamins	Water-soluble vitamins	none	none
PE(16:0/16:0)	50.8782	1.30416	6.92364	0.250985	25601.5	16702.3	1.53281	0.616182	-3.2911	0.00175405	0.0117424	Lipid metabolism	Glycerophospholipid metabolism	ANPNEG/ANPPOS	NA	HMDB08923	5681-36-7	NA	NA	NA	NA	NA
PC(14:1(9Z)/22:6(4Z,7Z,10Z,13Z,16Z,19Z))	0.55029	99.3313	0.074885	19.1163	8187.41	5498.14	1.48913	0.574466	-2.57342	0.0126948	0.0485626	Lipid metabolism	Glycerophospholipid metabolism	ANPPOS	NA	NA	NA	NA	NA	NA	NA	NA
718.4816@7.12	0.524761	0.767384	0.0714109	0.147683	15621.4	10681.5	1.46248	0.548412	-3.07051	0.00311109	0.0177112	NA	Likely addducts of phospholipids	ANPNEG	NA	NA	NA	NA	NA	NA	NA	NA
Homovanillic Acid	0.4526	0.570372	0.0615911	0.109768	294807	203594	1.44801	0.534075	-3.73881	0.000395787	0.00457192	Amino acids	Tyrosine/phenylalanine metabolism	ANPNEG	C05582	HMDB00118	306-08-1	NA	NA	NA	NA	NA
4-Hydroxyphenyllactate	87.0039	0.626073	11.8397	0.120488	284474	200824	1.41654	0.502367	-2.84922	0.00567124	0.0264026	Amino acids	Tyrosine/phenylalanine metabolism	ANPNEG	C03672	HMDB00755	6482-98-0	Organic acids	Carboxylic acids	none	none	none
Guanidinosuccinic Acid	0.312054	0.467202	0.0424652	0.089913	1.36998e+06	983599	1.39282	0.478012	-3.81046	0.000384209	0.00457192	Amino acids	Arginine and Proline metabolism	ANPPOS	C03139	HMDB03157	6133-30-8	NA	NA	NA	NA	NA
Histamine	0.310951	0.33241	0.042315	0.0639723	21276	15512.9	1.37151	0.455764	-3.17797	0.00213583	0.0131576	Amino acids	Histidine metabolism	ANPPOS	C00388	HMDB00870	51-45-6	Peptides	Amines	Biogenic amines	none	none
N-formylglutamate	72.3049	101.155	9.83945	19.4673	5392625	3939672	1.3688	0.452912	-3.6383	0.000599921	0.00619632	Amino acids	Histidine metabolism	ANPNEG/ANPPOS	C01045	HMDB03470	NA	NA	NA	NA	NA	NA
SAICAR-riboside	0.523252	0.340817	0.0712055	0.0655903	342110	254988	1.34167	0.424033	-2.92862	0.00444809	0.0226477	Purine and pyrimidine metabolism/nucleotide metabolism	Purine metabolism	ANPNEG/ANPPOS	NA	NA	NA	NA	NA	NA	NA	NA
PC(20:5(5Z,8Z,11Z,14Z,17Z)/22:6(4Z,7Z,10Z,13Z,16Z,19Z))	0.330751	0.723821	0.0450095	0.139299	33633.7	25364.8	1.326	0.407077	-2.89674	0.00574106	0.0264026	Lipid metabolism	Glycerophospholipid metabolism	ANPPOS	NA	NA	NA	NA	NA	NA	NA	NA
Aconitic Acid	0.216735	0.174199	0.0294939	0.0335247	11993077	9489622	1.26381	0.337779	-5.94013	1.07795e-07	8.6595e-06	Energy metabolism	Citrate cycle (TCA cycle)	ANPNEG	C00417	HMDB00072	499-12-7	Organic acids	Carboxylic acids	Tricarboxylic acids	none	none
O-Acetylserine	0.170979	0.160507	0.0232673	0.0308896	791988	627262	1.26261	0.336411	-6.7001	7.22013e-09	1.30504e-06	Amino acids	Cysteine and Methionine metabolism	ANPNEG/ANPPOS	C00979	HMDB03011	5147-00-2	Peptides	Amino acids	none	none	none
Guanidinoacetic Acid	0.210492	0.13269	0.0286444	0.0255362	700476	577312	1.21334	0.278984	-5.20531	1.56909e-06	8.1032e-05	Amino acids	Glycine, serine, and threonine metabolism	ANPNEG/ANPPOS	C00581	HMDB00128	352-97-6	Peptides	Amino acids	none	none	none
N-Acetylalanine	0.270258	0.357251	0.0367774	0.0687529	137516	113669	1.20979	0.27476	-2.76051	0.00796524	0.0334818	Amino acids	Amino acid modification	ANPNEG/ANPPOS	NA	HMDB00766	97-69-8	NA	NA	NA	NA	NA
AIR	0.158396	0.170099	0.021555	0.0327356	80475.7	71711.9	1.12221	0.166339	-3.10174	0.00319676	0.0178201	Purine and pyrimidine metabolism/nucleotide metabolism	Purine metabolism	ANPNEG/ANPPOS	C03373	HMDB01235	NA	NA	NA	NA	NA	NA
Sarcosine	0.111653	0.149022	0.015194	0.0286794	801454	732680	1.09387	0.129435	-3.03405	0.00419193	0.0218187	Amino acids	Glycine, serine, and threonine metabolism	ANPNEG/ANPPOS	C00213	HMDB00271	107-97-1	Peptides	Amino acids	none	none	none
Aspartic Acid	0.136109	0.280564	0.018522	0.0539946	28034139	33511991	0.836541	-0.257493	2.90711	0.00671231	0.0294121	Amino acids	Alanine, Aspartate, and Glutamate metabolism	ANPNEG	C00049	HMDB00191	56-84-8	Peptides	Amino acids	Common amino acids	none	none
2-Aminobutyric Acid	0.202554	0.166308	0.0275641	0.0320059	154683	187442	0.825233	-0.277127	4.65724	2.28733e-05	0.000486393	Amino acids	Cysteine and Methionine metabolism	ANPNEG	C02356	HMDB00452	1492-24-6	Lipids	Fatty acyls	Fatty Acids and Conjugates	Amino fatty acids	none
Alanine	0.272934	0.298511	0.0371416	0.0574485	1777294	2204009	0.806391	-0.310448	2.79401	0.00788998	0.0333594	Amino acids	Alanine, Aspartate, and Glutamate metabolism	ANPPOS	C00041	HMDB00161	56-41-7	Peptides	Amino acids	Common amino acids	none	none
PC(16:0/22:5(4Z,7Z,10Z,13Z,16Z))	0.262249	0.541301	0.0356875	0.104173	7176781	8986715	0.798599	-0.324457	2.63527	0.01256	0.0483026	Lipid metabolism	Glycerophospholipid metabolism	ANPPOS	NA	NA	NA	NA	NA	NA	NA	NA
PC(36:2)	0.287972	0.433944	0.0391881	0.0835125	11483392	14388525	0.798094	-0.32537	2.74147	0.00942689	0.0389465	Lipid metabolism	Glycerophospholipid metabolism	ANPPOS	C00157	HMDB08590	NA	Lipids	Glycerophospholipids	Glycerophosphocholines	Diacylglycerophosphocholines	none
PC(14:0/22:4(7Z,10Z,13Z,16Z))	0.28281	0.444885	0.0384855	0.0856182	17933739	22526387	0.796121	-0.32894	2.96746	0.00505413	0.0241996	Lipid metabolism	Glycerophospholipid metabolism	ANPPOS	NA	NA	NA	NA	NA	NA	NA	NA
3-Hydroxykynurenine	0.37363	0.317169	0.0508446	0.0610393	51186	64812.7	0.789753	-0.340527	2.68821	0.00963877	0.0391507	Amino acids	Tryptophan metabolism	ANPNEG/ANPPOS	C02794	HMDB00732	2147-61-7	NA	NA	NA	NA	NA
PC(36:4)	0.282206	0.439581	0.0384034	0.0845974	17994518	22942544	0.78433	-0.350468	3.04147	0.00422493	0.0218187	Lipid metabolism	Glycerophospholipid metabolism	ANPPOS	C00157	HMDB07983	NA	Lipids	Glycerophospholipids	Glycerophosphocholines	Diacylglycerophosphocholines	none
2-Hexenoylcarnitine	0.136505	0.188547	0.018576	0.0362859	200888	257120	0.781303	-0.356046	5.15476	1.1314e-05	0.000302963	Lipid metabolism	Carnitine metabolism	ANPPOS	NA	NA	NA	NA	NA	NA	NA	NA
3-Phosphoglyceroinositol	0.278437	0.190309	0.0378905	0.0366251	6169787	7908840	0.780113	-0.358245	4.71973	1.44016e-05	0.000341172	Lipid metabolism	Glycerophospholipid metabolism	ANPNEG	C01225	HMDB11649	NA	NA	NA	NA	NA	NA
791.564@6.69	0.354014	0.452356	0.0481752	0.0870559	252884	325829	0.776124	-0.365641	2.87865	0.00605212	0.0271782	NA	Likely addducts of phospholipids	ANPNEG	NA	NA	NA	NA	NA	NA	NA	NA
PC(14:0/22:1(13Z))	0.281536	0.436226	0.0383122	0.0839518	2507185	3239989	0.773825	-0.36992	3.05046	0.00441523	0.0226398	Lipid metabolism	Glycerophospholipid metabolism	ANPPOS	NA	NA	NA	NA	NA	NA	NA	NA
Betaine	0.187301	0.268063	0.0254884	0.0515887	15368933	20061794	0.76608	-0.384434	3.90269	0.000425306	0.0045895	Amino acids	Glycine, serine, and threonine metabolism	ANPPOS	C00719	HMDB00043	107-43-7	NA	NA	NA	NA	NA
Proline	0.250291	0.316835	0.0340602	0.060975	1552576	2031550	0.764232	-0.387917	3.55355	0.00108313	0.00889889	Amino acids	Arginine and Proline metabolism	ANPNEG/ANPPOS	C00148	HMDB00162	147-85-3	Peptides	Amino acids	Common amino acids	none	none
PC(DiMe(11,3)/DiMe(11,3))	0.267784	0.51916	0.0364408	0.0999124	64795.1	85062.3	0.761736	-0.392637	2.81995	0.00820264	0.0340834	Lipid metabolism	Glycerophospholipid metabolism	ANPPOS	NA	NA	NA	NA	NA	NA	NA	NA
PC(18:0/22:5(4Z,7Z,10Z,13Z,16Z))	0.33297	0.623941	0.0453115	0.120078	1095052	1444915	0.757866	-0.399985	2.72376	0.00997768	0.040077	Lipid metabolism	Glycerophospholipid metabolism	ANPPOS	NA	NA	NA	NA	NA	NA	NA	NA
838.5522@6.45	0.319742	0.426863	0.0435114	0.0821498	27402.5	36256.3	0.755801	-0.403921	3.49048	0.00111733	0.00898486	NA	Likely addducts of phospholipids	ANPNEG	NA	NA	NA	NA	NA	NA	NA	NA
PC(18:2(9Z,12Z)/P-18:1(11Z))	0.368616	0.494018	0.0501623	0.0950739	543078	718656	0.755685	-0.404143	2.89327	0.00628486	0.027877	Lipid metabolism	Glycerophospholipid metabolism	ANPPOS	NA	NA	NA	NA	NA	NA	NA	NA
843.5876@6.65	0.282667	0.319549	0.0384661	0.0614973	23106.5	30580.3	0.755601	-0.404303	3.50207	0.00120873	0.00898486	NA	Likely addducts of phospholipids	ANPNEG	NA	NA	NA	NA	NA	NA	NA	NA
ArachidonoylPAF C16/PC(O-16:0/20:4)	0.367894	0.490495	0.0500641	0.0943958	542207	723591	0.749328	-0.416331	2.98297	0.0049729	0.0239694	Lipid metabolism	Glycerophospholipid metabolism	ANPPOS	NA	HMDB13407	86288-11-1	NA	NA	NA	NA	NA
CDP-DG(16:0/16:0)?	0.320756	0.466942	0.0436493	0.089863	14849.4	19903.5	0.74607	-0.422617	3.32127	0.0019879	0.0125909	Lipid metabolism	Glycerophospholipid metabolism	ANPNEG	NA	NA	NA	NA	NA	NA	NA	NA
PC(18:0/22:6(4Z,7Z,10Z,13Z,16Z,19Z))	0.371653	0.621072	0.0505756	0.119525	2727903	3681187	0.741039	-0.432379	2.74772	0.00948898	0.0389803	Lipid metabolism	Glycerophospholipid metabolism	ANPPOS	NA	NA	NA	NA	NA	NA	NA	NA
PC(18:3(6Z,9Z,12Z)/P-16:0)	0.401555	0.524775	0.0546447	0.100993	18545.8	25223	0.735275	-0.443645	3.18312	0.00299183	0.0171674	Lipid metabolism	Glycerophospholipid metabolism	ANPPOS	NA	NA	NA	NA	NA	NA	NA	NA
PC(18:0/22:4(7Z,10Z,13Z,16Z))	0.412401	0.671322	0.0561207	0.129196	343433	474010	0.724527	-0.464888	2.69115	0.0106083	0.0421419	Lipid metabolism	Glycerophospholipid metabolism	ANPPOS	NA	NA	NA	NA	NA	NA	NA	NA
893.6073@6.34	0.435263	0.526441	0.0592318	0.101314	69848.4	97237.2	0.71833	-0.477282	3.2491	0.00259072	0.0154801	NA	Likely addducts of phospholipids	ANPNEG	NA	NA	NA	NA	NA	NA	NA	NA
800.5609@6.61	0.416196	0.536029	0.0566372	0.103159	14277.4	19905.5	0.717259	-0.479433	3.26833	0.00214744	0.0131576	NA	Likely addducts of phospholipids	ANPNEG	NA	NA	NA	NA	NA	NA	NA	NA
PC(16:0/22:4(7Z,10Z,13Z,16Z))	0.392834	0.573519	0.0534579	0.110374	16285760	22742931	0.71608	-0.481807	3.15189	0.00329297	0.0181742	Lipid metabolism	Glycerophospholipid metabolism	ANPPOS	NA	NA	NA	NA	NA	NA	NA	NA
865.5783@6.4	0.377205	0.437747	0.0513311	0.0842445	161714	228292	0.708362	-0.497442	3.86327	0.000397315	0.00457192	NA	Likely addducts of phospholipids	ANPNEG	NA	NA	NA	NA	NA	NA	NA	NA
819.5948@6.62	0.336097	0.474112	0.0457371	0.091243	624381	884338	0.706043	-0.502171	3.74297	0.000563407	0.00590352	NA	Likely addducts of phospholipids	ANPNEG	NA	NA	NA	NA	NA	NA	NA	NA
PS(18:0/20:3(8Z,11Z,14Z))	0.631669	0.635737	0.0859592	0.122348	1791192	2538795	0.705528	-0.503224	2.99544	0.00476324	0.0234273	Lipid metabolism	Glycerophospholipid metabolism	ANPNEG	NA	NA	NA	NA	NA	NA	NA	NA
N-Methylglutamic Acid	0.351231	0.413017	0.0477965	0.0794851	506342	718261	0.704956	-0.504396	3.41202	0.00166044	0.0114875	Amino acids	Amino acid modification	ANPNEG	C01046	NA	35989-16-3	NA	NA	NA	NA	NA
LysoPE(0:0/18:0)	0.401375	0.58962	0.0546202	0.113472	275152	390836	0.704008	-0.506336	2.92557	0.00580637	0.0264026	Lipid metabolism	Glycerophospholipid metabolism	ANPNEG	NA	NA	NA	NA	NA	NA	NA	NA
PC(16:1(9Z)/22:2(13Z,16Z))	0.372173	0.532615	0.0506463	0.102502	2241748	3193547	0.701962	-0.510536	3.51264	0.00121847	0.00898486	Lipid metabolism	Glycerophospholipid metabolism	ANPPOS	NA	NA	NA	NA	NA	NA	NA	NA
Phenylalanine	0.301205	0.429397	0.0409888	0.0826374	6072969	8699292	0.698099	-0.518496	3.38128	0.0019139	0.0122456	Amino acids	Phenylalanine metabolism	ANPNEG/ANPPOS	C00079	HMDB00159	63-91-2	Peptides	Amino acids	Common amino acids	none	none
PS(18:0/20:4(5Z,8Z,11Z,14Z))	0.50137	0.588735	0.0682279	0.113302	6042838	8674076	0.696655	-0.521484	3.30897	0.0020027	0.0125909	Lipid metabolism	Glycerophospholipid metabolism	ANPNEG	NA	NA	NA	NA	NA	NA	NA	NA
PI(16:0/16:0)	0.493321	0.5847	0.0671325	0.112526	4328220	6229434	0.694801	-0.525327	3.35148	0.00177869	0.0117981	Lipid metabolism	Glycerophospholipid metabolism	ANPNEG	NA	NA	NA	NA	NA	NA	NA	NA
Choline	0.226159	0.351416	0.0307763	0.06763	21483305	31060868	0.691652	-0.531882	3.74912	0.000748666	0.00708661	Amino acids	Glycine, serine, and threonine metabolism	ANPPOS	C00114	HMDB00097	62-49-7	NA	NA	NA	NA	NA
Glutamic Acid	0.262614	0.210386	0.0357373	0.0404889	24293261	35239230	0.689381	-0.536626	6.64222	3.15485e-08	4.56191e-06	Amino acids	Alanine, Aspartate, and Glutamate metabolism	ANPNEG/ANPPOS	C00025	HMDB00148	56-86-0	Peptides	Amino acids	Common amino acids	none	none
866.5814@6.39	0.336976	0.410579	0.0458567	0.079016	175378	254844	0.688177	-0.539147	4.35926	9.17658e-05	0.00138222	NA	Likely addducts of phospholipids	ANPNEG	NA	NA	NA	NA	NA	NA	NA	NA
PS(18:0/22:5(7Z,10Z,13Z,16Z,19Z))	0.511584	0.575039	0.0696177	0.110666	1957806	2847503	0.687552	-0.54046	3.38729	0.00168419	0.0114875	Lipid metabolism	Glycerophospholipid metabolism	ANPNEG	NA	NA	NA	NA	NA	NA	NA	NA
5-Formyldihydrofolate ( 5-F-DHF)	0.425504	0.481741	0.0579038	0.0927111	38916.9	56658.3	0.68687	-0.54189	2.73189	0.00959912	0.0391507	Cofactor, vitamin and antioxidant metabolism	Folate metabolism	ANPNEG/ANPPOS	NA	NA	NA	NA	NA	NA	NA	NA
851.5658@6.4	0.371133	0.367806	0.0505048	0.0707843	39801.7	58032.6	0.68585	-0.544034	4.60844	3.76159e-05	0.000647531	NA	Likely addducts of phospholipids	ANPNEG	NA	NA	NA	NA	NA	NA	NA	NA
Dimethylglycine	0.265683	0.219598	0.0361549	0.0422616	745976	1.09028e+06	0.684207	-0.547495	6.54777	4.81358e-08	5.80036e-06	Amino acids	Glycine, serine, and threonine metabolism	ANPNEG/ANPPOS	C01026	HMDB00092	1118-68-9	NA	NA	NA	NA	NA
Arachidonic Acid	0.601092	0.650157	0.0817983	0.125123	15040	21999.5	0.683655	-0.54866	2.78527	0.00803082	0.0335623	Lipid metabolism	Arachidonic acid metabolism	ANPNEG	C00219	HMDB01043	506-32-1	Lipids	Fatty acyls	Fatty Acids and Conjugates	Unsaturated fatty acids	Polyunsaturated fatty acids
851.4939@6.51	0.364198	0.499336	0.0495611	0.0960973	30977.9	45315.3	0.683609	-0.548757	3.07487	0.00417036	0.0218187	NA	Likely addducts of phospholipids	ANPNEG	NA	NA	NA	NA	NA	NA	NA	NA
PS(18:1(9Z)/20:4(5Z,8Z,11Z,14Z))	0.450097	0.495437	0.0612505	0.0953469	823452	1.20722e+06	0.682109	-0.551927	3.95478	0.000306338	0.00375394	Lipid metabolism	Glycerophospholipid metabolism	ANPNEG	NA	NA	NA	NA	NA	NA	NA	NA
847.6164@6.55	0.299902	0.348763	0.0408115	0.0671194	74493.6	109711	0.678998	-0.558521	4.60267	4.89099e-05	0.000803679	NA	Likely addducts of phospholipids	ANPNEG	NA	NA	NA	NA	NA	NA	NA	NA
Tryptophan	0.273181	0.394568	0.0371752	0.0759347	859000	1.26533e+06	0.678874	-0.558783	3.70788	0.000808637	0.00749544	Amino acids	Tryptophan metabolism	ANPNEG/ANPPOS	C00078	HMDB00929	73-22-3	Peptides	Amino acids	Common amino acids	none	none
Flavin Adenine Dinucleotide (Fad)	0.296712	0.341103	0.0403774	0.0656453	78955.9	117062	0.67448	-0.568152	3.41945	0.0016719	0.0114875	Cofactor, vitamin and antioxidant metabolism	Riboflavin metabolism	ANPNEG/ANPPOS	C00016	HMDB01248	146-14-5	Vitamins and Cofactors	Cofactors	Coenzymes	none	none
SM(d18:1/22:1(13Z))	0.456804	0.724846	0.0621631	0.139497	60003.7	88997.2	0.674219	-0.56871	2.93445	0.00598042	0.027024	Lipid metabolism	Sphingolipid /ceramide metabolism	ANPPOS	NA	NA	NA	NA	NA	NA	NA	NA
Glutamine	0.455581	0.48834	0.0619968	0.093981	3875348	5767629	0.671914	-0.573652	3.49969	0.00122901	0.00898486	Amino acids	Alanine, Aspartate, and Glutamate metabolism	ANPNEG/ANPPOS	C00064	HMDB00641	56-85-9	Peptides	Amino acids	Common amino acids	none	none
5'-Methylthioadenosine (MTA)	0.523438	0.585285	0.0712309	0.112638	1796350	2675985	0.671286	-0.575002	2.62599	0.0123277	0.0481781	Amino acids	Cysteine and Methionine metabolism	ANPPOS	C00170	HMDB01173	2457-80-9	Nucleic acids	none	none	none	none
4-Hydroxy-Proline	0.203172	0.278363	0.0276482	0.053571	394122	591392	0.666431	-0.585472	6.03768	8.19172e-07	4.55586e-05	Amino acids	Arginine and Proline metabolism	ANPNEG/ANPPOS	C01157	NA	2584-71-6	Peptides	Amino acids	Other amino acids	none	none
935.5823@6.37	0.397245	0.491391	0.0540582	0.0945682	29465	44361.8	0.664197	-0.590316	3.86562	0.000420975	0.0045895	NA	Likely addducts of phospholipids	ANPNEG	NA	NA	NA	NA	NA	NA	NA	NA
826.5659@6.47	0.451539	0.551405	0.0614466	0.106118	52421.5	79065.3	0.663014	-0.592888	3.50225	0.00118686	0.00898486	NA	Likely addducts of phospholipids	ANPNEG	NA	NA	NA	NA	NA	NA	NA	NA
dTDP-Glucose	0.826956	0.291853	0.112534	0.0561672	191974	289664	0.66275	-0.593464	4.97149	5.1902e-06	0.000156355	Amino sugar and nucleotide sugar metabolism	Nucleotide sugar metabolism	ANPNEG	C00842	HMDB01328	2196-62-5	NA	NA	NA	NA	NA
Tyrosine	0.293378	0.433701	0.0399236	0.0834658	5546871	8399379	0.660391	-0.598608	3.59263	0.00113163	0.00898486	Amino acids	Tyrosine/phenylalanine metabolism	ANPNEG/ANPPOS	C00082	HMDB00158	60-18-4	Peptides	Amino acids	Common amino acids	none	none
PI(16:0/18:1(11Z))	0.457864	0.561954	0.0623074	0.108148	3561578	5449247	0.653591	-0.61354	3.60362	0.00096431	0.00829995	Lipid metabolism	Glycerophospholipid metabolism	ANPNEG	NA	NA	NA	NA	NA	NA	NA	NA
3'-Sialyllactose	0.27729	0.447713	0.0377344	0.0861624	48430.9	74141.5	0.653222	-0.614354	3.8983	0.000495402	0.00526729	Carbohydrate metabolism	Carbohydrates	ANPNEG	NA	HMDB00825	35890-38-1	NA	NA	NA	NA	NA
5Allotetrahydrocortisol	0.650139	0.46232	0.0884727	0.0889735	14446.9	22175	0.651492	-0.618181	3.97763	0.000255308	0.00318255	Lipid metabolism	Steroid metabolism	ANPPOS	NA	HMDB00526	302-91-0	NA	NA	NA	NA	NA
N-Acetydglutamic Acid	0.420197	0.585639	0.0571816	0.112706	888385	1371798	0.647607	-0.62681	2.96252	0.00578093	0.0264026	Amino acids	Arginine and Proline metabolism	ANPNEG	C00624	HMDB01138	1188-37-0	Peptides	Amino acids	none	none	none
SM(d18:1/24:1(15Z))	0.56426	0.821971	0.0767861	0.158188	970834	1.50221e+06	0.646269	-0.629793	2.62078	0.0131643	0.0498314	Lipid metabolism	Sphingolipid /ceramide metabolism	ANPPOS	NA	NA	NA	NA	NA	NA	NA	NA
1,3-Dipalmitoylglycerol	0.685788	0.566574	0.093324	0.109037	2876.26	4472.72	0.643069	-0.636954	2.79786	0.00772751	0.0330591	Lipid metabolism	Glycerophospholipid metabolism	ANPNEG	NA	HMDB56009	30334-71-5	NA	NA	NA	NA	NA
PE(16:0/P-18:0)	50.8782	1.20928	6.92365	0.232727	26331.9	41047.9	0.641493	-0.640494	3.01859	0.00463169	0.0231805	Lipid metabolism	Glycerophospholipid metabolism	ANPNEG	NA	NA	NA	NA	NA	NA	NA	NA
SM(d18:1/14:0)	0.463745	0.71947	0.0631077	0.138462	76811.4	120010	0.640044	-0.643758	3.56231	0.00102307	0.00850207	Lipid metabolism	Sphingolipid /ceramide metabolism	ANPPOS	NA	NA	NA	NA	NA	NA	NA	NA
Glutaric Acid	0.340164	0.334959	0.0462905	0.0644628	863174	1363161	0.633215	-0.659233	5.06474	1.22223e-05	0.000304714	Amino acids	Lysine degradation	ANPNEG	C00489	HMDB00661	110-94-1	Lipids	Fatty acyls	Fatty Acids and Conjugates	Dicarboxylic acids	none
Cytosine	0.524057	0.362492	0.0713152	0.0697617	455932	724142	0.629616	-0.667455	4.52768	3.39212e-05	0.000630344	Purine and pyrimidine metabolism/nucleotide metabolism	Pyrimidine metabolism	ANPNEG	C00380	HMDB00630	71-30-7	Nucleic acids	Bases	Pyrimidines	none	none
PI(16:0/18:2(9Z,12Z))	0.47628	0.578951	0.0648135	0.111419	4558540	7260167	0.627884	-0.671431	3.65473	0.000846561	0.00770742	Lipid metabolism	Glycerophospholipid metabolism	ANPNEG	NA	NA	NA	NA	NA	NA	NA	NA
Thiamine (Vit B1)	0.264681	0.376943	0.0360186	0.0725426	24967.9	39783.2	0.627597	-0.672089	4.1569	0.000254968	0.00318255	Cofactor, vitamin and antioxidant metabolism	Thiamine metabolism	ANPPOS	C00378	HMDB00235	59-43-8	Vitamins and Cofactors	Vitamins	Water-soluble vitamins	none	none
N-Acetylaspartic Acid	0.27027	0.327126	0.036779	0.0629553	15794306	25291249	0.624497	-0.679234	5.55811	3.31304e-06	0.000114063	Amino acids	Alanine, Aspartate, and Glutamate metabolism	ANPNEG	C01042	HMDB00812	997-55-7	Peptides	Amino acids	none	none	none
PS(18:0/22:6(4Z,7Z,10Z,13Z,16Z,19Z))	0.493779	0.597769	0.0671949	0.115041	6200933	10141681	0.61143	-0.70974	3.71675	0.000721853	0.00695866	Lipid metabolism	Glycerophospholipid metabolism	ANPNEG	NA	NA	NA	NA	NA	NA	NA	NA
DG(14:0/0:0/18:0)	0.731776	0.596598	0.0995821	0.114815	2693.4	4417.31	0.609737	-0.713741	2.91724	0.00577673	0.0264026	Lipid metabolism	Glycerophospholipid metabolism	ANPNEG	NA	NA	NA	NA	NA	NA	NA	NA
PI(16:0/16:1(9Z))	0.37647	0.482228	0.0512311	0.0928049	1138121	1875567	0.606814	-0.720673	4.71393	3.91085e-05	0.000657569	Lipid metabolism	Glycerophospholipid metabolism	ANPNEG	NA	NA	NA	NA	NA	NA	NA	NA
2-Aminoisobutyric Acid	0.487265	0.624471	0.0663083	0.120179	827652	1.37369e+06	0.602505	-0.730956	3.05308	0.00407328	0.0216932	Others	Nonprotein amino acid	ANPNEG	C03665	HMDB01906	62-57-7	NA	NA	NA	NA	NA
UDP-N-Acetylglucosamine	0.641977	0.340594	0.0873619	0.0655474	55948566	92973912	0.601766	-0.732725	4.58714	3.57457e-05	0.000630344	Amino sugar and nucleotide sugar metabolism	Nucleotide sugar metabolism	ANPNEG/ANPPOS	C00043	HMDB00290	91183-98-1	Carbohydrates	Monosaccharides	Amino sugars	none	none
Butyric Acid	0.532257	0.419848	0.072431	0.0807998	8890.89	14775.3	0.60174	-0.732788	4.21713	0.000146894	0.00197873	Butyrate metabolism	Butyrate metabolism	ANPNEG	C00246	HMDB00039	107-92-6	Lipids	Fatty acyls	Fatty Acids and Conjugates	Straight chain fatty acids	none
UDP-N-acetygalactosamine	0.645451	0.341043	0.0878347	0.0656338	55663674	92606927	0.601075	-0.734384	4.5897	3.54236e-05	0.000630344	Amino sugar and nucleotide sugar metabolism	Nucleotide sugar metabolism	ANPNEG/ANPPOS	C00203	HMDB60522	108320-87-2	NA	NA	NA	NA	NA
SM(d18:1/18:1(11Z))	0.44329	0.604319	0.0603241	0.116301	96933.1	161655	0.599629	-0.737857	4.17595	0.000192284	0.00252767	Lipid metabolism	Sphingolipid /ceramide metabolism	ANPPOS	NA	NA	NA	NA	NA	NA	NA	NA
Adenine	0.508214	0.533393	0.0691592	0.102652	1404489	2357481	0.595758	-0.747201	3.73576	0.00064198	0.00635824	Purine and pyrimidine metabolism/nucleotide metabolism	Purine metabolism	ANPPOS	C00147	HMDB01384	73-24-5	Nucleic acids	Bases	Purines	none	none
PAF C18:0	0.574951	71.8096	0.0782409	13.8198	8108.4	13872.3	0.584504	-0.774715	3.20856	0.0029187	0.0168817	Lipid metabolism	Glycerophospholipid metabolism	ANPPOS	C04598	NA	79549-26-1	Lipids	Glycerophospholipids	Glycerophosphocholines	1-alkyl,2-acylglycerophosphocholines	none
3,5-Diiodotyrosine	0.545644	0.507444	0.0742527	0.0976576	119472	204408	0.584476	-0.774784	3.42904	0.00161595	0.0113431	Amino acids	Tyrosine/phenylalanine metabolism	ANPNEG/ANPPOS	C01060	HMDB03474	300-39-0	Peptides	Amino acids	Other amino acids	none	none
N-Carbamoyaspartic Acid	0.50828	0.376632	0.0691682	0.0724829	3750112	6455315	0.580934	-0.783554	4.97862	1.0123e-05	0.000281497	Purine and pyrimidine metabolism/nucleotide metabolism	Pyrimidine metabolism	ANPNEG	C00438	HMDB00828	13184-27-5	NA	NA	NA	NA	NA
Allantoin	0.788204	0.935638	0.107261	0.180064	919154	1.59854e+06	0.574995	-0.798378	2.61312	0.013004	0.0494837	Purine and pyrimidine metabolism/nucleotide metabolism	Purine metabolism	ANPNEG/ANPPOS	C01551	HMDB00462	97-59-6	NA	NA	NA	NA	NA
DG(14:0/0:0/16:0)	0.834923	0.749416	0.113619	0.144225	4679.65	8173.23	0.572558	-0.804506	2.6177	0.0132808	0.0498392	Lipid metabolism	Glycerophospholipid metabolism	ANPNEG	NA	NA	NA	NA	NA	NA	NA	NA
Dihydroorotic Acid	0.767951	0.841416	0.104505	0.161931	948186	1.66502e+06	0.569473	-0.8123	2.90467	0.00610245	0.027235	Purine and pyrimidine metabolism/nucleotide metabolism	Pyrimidine metabolism	ANPNEG/ANPPOS	C00337	HMDB00528	5988-19-2	NA	NA	NA	NA	NA
4-Aminobutanoate (GABA)	0.388813	0.5707	0.0529108	0.109831	28699.1	50777.4	0.565195	-0.82318	3.11165	0.00408059	0.0216932	Amino acids	Alanine, Aspartate, and Glutamate metabolism	ANPPOS	C00334	HMDB00112	56-12-2	Lipids	Fatty acyls	Fatty Acids and Conjugates	Amino fatty acids	none
879.5266@6.44	0.378573	0.464717	0.0515172	0.0894348	861309	1.53189e+06	0.562252	-0.830712	4.42576	0.000101429	0.00146667	NA	Likely addducts of phospholipids	ANPNEG	NA	NA	NA	NA	NA	NA	NA	NA
2-DCHA-PAF	0.605871	0.738373	0.0824486	0.1421	23335.1	41579.8	0.561212	-0.833382	3.17018	0.00319408	0.0178201	Lipid metabolism	Glycerophospholipid metabolism	ANPPOS	NA	NA	NA	NA	NA	NA	NA	NA
Deoxycarnitine	0.445055	0.898833	0.0605644	0.172981	144518	259592	0.556714	-0.844992	3.03277	0.0049663	0.0239694	Lipid metabolism	Carnitine metabolism	ANPPOS	C01181	HMDB01161	407-64-7	NA	NA	NA	NA	NA
Ribose	0.376507	0.520542	0.0512362	0.100178	59722.3	107513	0.555489	-0.848169	4.63851	5.1931e-05	0.00081622	Energy metabolism	Pentose phosphate pathway	ANPNEG	C08353	HMDB00283	50-69-1	NA	NA	NA	NA	NA
AMP	0.743747	0.62006	0.101211	0.119331	139085	250428	0.555389	-0.84843	3.15617	0.00276727	0.0162662	Purine and pyrimidine metabolism/nucleotide metabolism	Purine metabolism	ANPNEG/ANPPOS	C00020	HMDB00045	61-19-8	Nucleic acids	Nucleotides	Ribonucleotides	none	none
833.5285@6.74	0.511045	0.685968	0.0695444	0.132015	60480.4	109387	0.552904	-0.854899	3.16776	0.00338042	0.0185155	NA	Likely addducts of phospholipids	ANPNEG	NA	NA	NA	NA	NA	NA	NA	NA
ADP	0.559144	0.359058	0.0760898	0.0691007	945673	1715035	0.551402	-0.858825	4.73434	2.54067e-05	0.000517212	Purine and pyrimidine metabolism/nucleotide metabolism	Purine metabolism	ANPNEG/ANPPOS	C00008	HMDB01341	58-64-0	Nucleic acids	Nucleotides	Ribonucleotides	none	none
Linolenyl Carnitine	0.782447	0.838144	0.106478	0.161301	20087.9	36476.5	0.550707	-0.860642	2.89961	0.00578214	0.0264026	Lipid metabolism	Carnitine metabolism	ANPPOS	NA	HMDB06318	NA	NA	NA	NA	NA	NA
3-Methoxytyramine	0.59391	0.66187	0.080821	0.127377	29722.2	53998.8	0.550424	-0.861385	3.64564	0.000918556	0.0080014	Amino acids	Tyrosine/phenylalanine metabolism	ANPNEG/ANPPOS	C05587	HMDB00022	554-52-9	NA	NA	NA	NA	NA
Adenosine	1.01608	0.850234	0.138271	0.163628	781001	1.41934e+06	0.550257	-0.861821	2.70974	0.0102451	0.0409237	Purine and pyrimidine metabolism/nucleotide metabolism	Purine metabolism	ANPPOS	C00212	HMDB00050	58-61-7	Nucleic acids	Nucleosides	Ribonucleosides	none	none
NAD	50.7751	0.860734	6.90962	0.165648	18458	33600.2	0.549341	-0.864225	2.58353	0.0125425	0.0483026	Cofactor, vitamin and antioxidant metabolism	Nicotinate and nicotinamide metabolism	ANPNEG/ANPPOS	C00003	HMDB00902	53-84-9	Vitamins and Cofactors	Cofactors	Coenzymes	none	none
Phosphonoacetic Acid	0.759049	0.754433	0.103293	0.145191	2317144	4236174	0.54699	-0.870414	3.00214	0.00463669	0.0231805	Others	Phosphonate and phosphinate metabolism	ANPNEG	C05682	HMDB04110	4408-78-0	NA	NA	NA	NA	NA
Cysteine-S-Sulfonic Acid	0.5372	0.582515	0.0731037	0.112105	67671	124321	0.544324	-0.877463	3.48309	0.00138567	0.00991922	Amino acids	Cysteine and Methionine metabolism	ANPNEG/ANPPOS	C05824	HMDB00731	1637-71-4	NA	NA	NA	NA	NA
907.5573@6.37	0.384856	0.468587	0.0523723	0.0901797	922518	1.70052e+06	0.542491	-0.88233	4.82518	3.41331e-05	0.000630344	NA	Likely addducts of phospholipids	ANPNEG	NA	NA	NA	NA	NA	NA	NA	NA
5'-CMP	0.858764	0.394278	0.116863	0.0758789	43992.9	81402.2	0.540439	-0.887796	4.41685	3.57093e-05	0.000630344	Purine and pyrimidine metabolism/nucleotide metabolism	Pyrimidine metabolism	ANPNEG/ANPPOS	C00055	HMDB00095	63-37-6	Nucleic acids	Nucleotides	Ribonucleotides	none	none
Hexanoylcarnitine	0.439465	0.651317	0.0598036	0.125346	68936	128120	0.538056	-0.894172	2.63373	0.0133069	0.0498392	Lipid metabolism	Carnitine metabolism	ANPPOS	NA	HMDB00705	NA	NA	NA	NA	NA	NA
Nicotinamide N-Oxide	0.738796	0.622108	0.100537	0.119725	4143680	7702085	0.537995	-0.894336	3.32155	0.00188002	0.0121389	Cofactor, vitamin and antioxidant metabolism	Nicotinate and nicotinamide metabolism	ANPPOS	NA	HMDB02730	1986-81-8	NA	NA	NA	NA	NA
PAF C16:0	0.469335	0.722253	0.0638684	0.138998	928702	1.73649e+06	0.534816	-0.902885	3.55092	0.00121948	0.00898486	Lipid metabolism	Glycerophospholipid metabolism	ANPPOS	C04598	NA	74389-68-7	Lipids	Glycerophospholipids	Glycerophosphocholines	1-alkyl,2-acylglycerophosphocholines	none
LysoPC(18:0)	0.469373	0.717826	0.0638736	0.138146	929802	1.74732e+06	0.532129	-0.910151	3.54922	0.00123029	0.00898486	Lipid metabolism	Glycerophospholipid metabolism	ANPPOS	C04230	HMDB10384	NA	Lipids	Glycerophospholipids	Glycerophosphocholines	Monoacylglycerophosphocholines	none
Enantio-PAF C16	0.468965	0.71206	0.0638181	0.137036	931351	1.75092e+06	0.531922	-0.910715	3.55955	0.00119584	0.00898486	Lipid metabolism	Glycerophospholipid metabolism	ANPPOS	NA	NA	117985-57-6	NA	NA	NA	NA	NA
Serine	0.422236	0.465244	0.057459	0.0895363	526142	995556	0.528491	-0.92005	5.17471	1.18887e-05	0.000304714	Amino acids	Glycine, serine, and threonine metabolism	ANPNEG/ANPPOS	C00065	HMDB00187	56-45-1	Peptides	Amino acids	Common amino acids	none	none
Threonine	0.450903	0.490954	0.0613601	0.0944841	776084	1.47871e+06	0.524838	-0.930056	4.43121	0.00010645	0.00150908	Amino acids	Glycine, serine, and threonine metabolism	ANPNEG/ANPPOS	C00188	HMDB00167	72-19-5	Peptides	Amino acids	Common amino acids	none	none
AICA riboside	0.754283	0.517207	0.102645	0.0995366	111482	212723	0.52407	-0.932168	4.25782	9.95076e-05	0.00146667	Purine and pyrimidine metabolism/nucleotide metabolism	Purine metabolism	ANPNEG/ANPPOS	NA	HMDB62179	NA	NA	NA	NA	NA	NA
Cytidine diphosphate choline (CDPcholine)	0.519138	0.660339	0.0706457	0.127082	88174.9	169917	0.518929	-0.946391	3.0152	0.0052184	0.0248217	Lipid metabolism	Glycerophospholipid metabolism	ANPPOS	C00307	HMDB01413	987-78-0	NA	NA	NA	NA	NA
PS(16:0/22:6(4Z,7Z,10Z,13Z,16Z,19Z))	0.430448	0.516335	0.0585766	0.0993688	1552325	2993564	0.518554	-0.947433	5.03851	1.74492e-05	0.000382297	Lipid metabolism	Glycerophospholipid metabolism	ANPNEG	NA	NA	NA	NA	NA	NA	NA	NA
Phenylacetaldehyde	0.573774	0.54946	0.0780808	0.105744	33859.4	66018.6	0.512877	-0.963315	3.92144	0.000421983	0.0045895	Others	Food additive	ANPNEG	C00601	HMDB06236	122-78-1	NA	NA	NA	NA	NA
PI(16:0/16:2(9Z,12Z))	0.437207	0.520283	0.0594963	0.100128	1026249	2013734	0.509625	-0.972492	5.1015	1.46284e-05	0.000341172	Lipid metabolism	Glycerophospholipid metabolism	ANPNEG	NA	NA	NA	NA	NA	NA	NA	NA
910.5647@6.38	0.575057	0.394564	0.0782553	0.0759339	39206.1	77060.3	0.508772	-0.97491	5.66017	2.34829e-06	0.000113187	NA	Likely addducts of phospholipids	ANPNEG	NA	NA	NA	NA	NA	NA	NA	NA
805.4964@6.79	0.665047	0.810435	0.0905014	0.155968	15074.5	29691.8	0.507699	-0.977955	2.84224	0.00779596	0.0331558	NA	Likely addducts of phospholipids	ANPNEG	NA	NA	NA	NA	NA	NA	NA	NA
SM(d18:0/14:0)	0.787204	0.926022	0.107125	0.178213	7463	14917.1	0.500299	-0.999138	3.72563	0.000640654	0.00635824	Lipid metabolism	Sphingolipid /ceramide metabolism	ANPPOS	NA	NA	NA	NA	NA	NA	NA	NA
Proline Betaine	0.473855	0.562905	0.0644835	0.108331	221264	446570	0.495474	-1.01312	3.36785	0.00213663	0.0131576	Amino acids	Arginine and Proline metabolism	ANPPOS	C10172	HMDB04827	471-87-4	Phytochemical compounds	Alkaloids	Alkaloids derived from ornithine	Pyrrolidine alkaloids	none
N-Acetylysine	0.454464	0.69669	0.0618447	0.134078	25028.8	51587.8	0.485169	-1.04344	2.92563	0.00679662	0.0296021	Amino acids	Lysine degradation	ANPPOS	C12989	HMDB00446	1946-82-3	NA	NA	NA	NA	NA
Glycocholic Acid	0.768963	0.862441	0.104643	0.165977	43183.2	90848.2	0.475334	-1.07299	3.47741	0.00137205	0.00991922	Lipid metabolism	Bile acid biosynthesis	ANPNEG	C01921	HMDB00138	475-31-0	Lipids	Sterol Lipids	Bile acids and derivatives	C26 bile acids, alcohols, and derivatives	none
12-Tridecenoic Acid	97.908	118.844	13.3236	22.8715	825.548	1740.78	0.47424	-1.07631	3.10108	0.00401935	0.0216865	Lipid metabolism	Fatty acid metabolism	ANPNEG	NA	NA	6006-06-0	NA	NA	NA	NA	NA
UDP-Glucose	0.702776	0.381333	0.0956357	0.0733876	19263428	40637034	0.474036	-1.07693	5.49845	3.03894e-06	0.000114063	Amino sugar and nucleotide sugar metabolism	Nucleotide sugar metabolism	ANPNEG	C00029	HMDB00286	133-89-1	Vitamins and Cofactors	Cofactors	Coenzymes	none	none
UDP-Galactose	0.703576	0.381423	0.0957446	0.073405	19234568	40594868	0.473818	-1.0776	5.50188	3.00132e-06	0.000114063	Amino sugar and nucleotide sugar metabolism	Nucleotide sugar metabolism	ANPNEG	C00052	HMDB00302	2956-16-3	NA	NA	NA	NA	NA
1-Methyladenosine	0.446756	0.622604	0.0607958	0.11982	74177.3	159212	0.465901	-1.1019	3.26205	0.0028587	0.0166681	Purine and pyrimidine metabolism/nucleotide metabolism	Nucleotide methylation	ANPPOS	C02494	HMDB03331	15763-06-1	NA	NA	NA	NA	NA
Thiamine Pyrophosphate?? Isomer	50.9739	0.388687	6.93667	0.0748028	55289.5	119680	0.461979	-1.1141	6.27398	9.28133e-08	8.6595e-06	Cofactor, vitamin and antioxidant metabolism	Thiamine metabolism	ANPNEG/ANPPOS	C00068	HMDB01372	154-87-0	Vitamins and Cofactors	Cofactors	Coenzymes	none	none
4-Hydroxy-2-Oxoglutaric Acid	0.366649	1.10375	0.0498945	0.212417	62307.2	135020	0.461466	-1.1157	3.23232	0.00320417	0.0178201	Glycylate and dicarboxylate metabolism	Glyoxylate and dicarboxylate metabolism	ANPNEG	C01127	HMDB02070	NA	NA	NA	NA	NA	NA
Carnitine	0.435054	0.646096	0.0592034	0.124341	10287327	22390861	0.459443	-1.12204	2.8961	0.00721408	0.0310463	Lipid metabolism	Carnitine metabolism	ANPPOS	C00318	HMDB00062	541-15-1	NA	NA	NA	NA	NA
GAR riboside	0.74494	1.08105	0.101373	0.208047	73060.1	160483	0.455252	-1.13526	2.72421	0.00978708	0.0395311	Purine and pyrimidine metabolism/nucleotide metabolism	Purine metabolism	ANPNEG/ANPPOS	NA	NA	NA	NA	NA	NA	NA	NA
205.0483@15.64	0.450231	0.899547	0.0612686	0.173118	294695	654893	0.449989	-1.15204	2.70155	0.011736	0.046367	NA	NA	NA	C00248	HMDB00962	940-69-2	NA	NA	NA	NA	NA
Histidine	0.400808	0.661999	0.0545431	0.127402	622742	1.39316e+06	0.447001	-1.16165	3.47034	0.00173753	0.0117405	Amino acids	Histidine metabolism	ANPPOS	C00135	HMDB00177	71-00-1	Peptides	Amino acids	Common amino acids	none	none
765.5736@0.99	0.333369	0.978113	0.0453657	0.188238	235089	543934	0.432201	-1.21023	3.52673	0.00155297	0.0110078	NA	NA	ANPPOS	NA	NA	NA	NA	NA	NA	NA	NA
DG(18:0/0:0/24:0)	97.9113	118.849	13.324	22.8725	887.238	2083.04	0.425933	-1.2313	2.66553	0.0125132	0.0483026	Lipid metabolism	Glycerophospholipid metabolism	ANPNEG	NA	NA	NA	NA	NA	NA	NA	NA
PS(14:0/14:0)	0.657874	0.878373	0.0895253	0.169043	36818.6	86741.8	0.424462	-1.23629	3.79016	0.000628434	0.00635824	Lipid metabolism	Glycerophospholipid metabolism	ANPNEG	NA	NA	NA	NA	NA	NA	NA	NA
5-Aminolevulinic Acid	0.536009	0.64652	0.0729416	0.124423	1957995	4620900	0.423726	-1.2388	3.95641	0.000419376	0.0045895	Porphyrin metabolism	Heme/porphyrin synthesis	ANPPOS	C00430	HMDB01149	106-60-5	NA	NA	NA	NA	NA
GMP	50.8505	0.48461	6.91987	0.0932632	23986.9	57534.1	0.416917	-1.26217	6.1007	3.44484e-07	2.22139e-05	Purine and pyrimidine metabolism/nucleotide metabolism	Purine metabolism	ANPNEG/ANPPOS	C00144	HMDB01397	85-32-5	Nucleic acids	Nucleotides	Ribonucleotides	none	none
4-Guanidinobutyric Acid	0.592198	0.704799	0.080588	0.135639	42584.5	103233	0.412509	-1.2775	3.08703	0.00420557	0.0218187	Amino acids	Arginine and Proline metabolism	ANPPOS	C01035	HMDB03464	463-00-3	NA	NA	NA	NA	NA
Arabinose	0.520803	0.878712	0.0708723	0.169108	51537.3	126093	0.408723	-1.2908	3.72207	0.000855279	0.00770742	Others	plant sugar	ANPNEG	C00216	HMDB29942	10323-20-3	Carbohydrates	Monosaccharides	Aldoses	none	none
Phosphocholine	0.999217	1.98467	0.135976	0.381949	2719666	6689618	0.40655	-1.29849	2.90974	0.00692336	0.0299736	Lipid metabolism	Glycerophospholipid metabolism	ANPPOS	C00588	HMDB01565	107-73-3	NA	NA	NA	NA	NA
1-Methylguanine	98.4101	1.29949	13.3919	0.250088	8906.98	22200.1	0.401213	-1.31756	2.96075	0.00550782	0.0260271	Purine and pyrimidine metabolism/nucleotide metabolism	Nucleotide methylation	ANPNEG/ANPPOS	C04152	HMDB03282	938-85-2	NA	NA	NA	NA	NA
Glycosylmet	0.552842	0.684654	0.0752322	0.131762	39528.4	99588.4	0.396918	-1.33309	4.74395	5.03504e-05	0.000808963	Amino acids	Maillard-Reation-like dry-down artefact?	ANPNEG/ANPPOS	NA	NA	NA	NA	NA	NA	NA	NA
Acetylcarnitine	0.470627	0.671352	0.0640443	0.129202	3213174	8642588	0.371784	-1.42746	3.07271	0.00474938	0.0234273	Lipid metabolism	Carnitine metabolism	ANPPOS	C02571	HMDB00201	3040-38-8	NA	NA	NA	NA	NA
Creatine	0.59924	0.764209	0.0815463	0.147072	1879025	5185678	0.362349	-1.46455	3.65581	0.00101591	0.00850207	Amino acids	Glycine, serine, and threonine metabolism	ANPPOS	C00300	HMDB00064	57-00-1	NA	NA	NA	NA	NA
Valerylcarnitine	0.507742	0.664267	0.0690949	0.127838	576026	1.62495e+06	0.354488	-1.49619	3.74029	0.000863487	0.00770742	Lipid metabolism	Carnitine metabolism	ANPPOS	NA	HMDB13128	NA	NA	NA	NA	NA	NA
Sn-Glycero3-Phosphocholine	0.343126	0.647638	0.0466936	0.124638	9950557	28139530	0.353615	-1.49975	3.73951	0.000893899	0.00788158	Lipid metabolism	Glycerophospholipid metabolism	ANPPOS	C00670	HMDB00086	28319-77-9	NA	NA	NA	NA	NA
PS(14:0/14:1(9Z))	0.422214	0.998604	0.0574561	0.192181	22071.4	66101.8	0.3339	-1.58251	3.45137	0.00188043	0.0121389	Lipid metabolism	Glycerophospholipid metabolism	ANPNEG	NA	NA	NA	NA	NA	NA	NA	NA
LysoPC(18:2)	0.632999	0.804161	0.0861402	0.154761	945000	2910725	0.324661	-1.62299	3.35454	0.00223704	0.0135914	Lipid metabolism	Glycerophospholipid metabolism	ANPPOS	C04230	HMDB10386	NA	Lipids	Glycerophospholipids	Glycerophosphocholines	Monoacylglycerophosphocholines	none
S-Adenosylmethionine (SAM)	0.45371	0.703031	0.0617421	0.135298	270986	847502	0.319746	-1.645	3.68693	0.00100961	0.00850207	Amino acids	Cysteine and Methionine metabolism	ANPPOS	C00019	HMDB01185	29908-03-0	Vitamins and Cofactors	Cofactors	Coenzymes	none	none
311.1092@0.88??	0.740267	1.06861	0.100738	0.205655	59901.8	189203	0.316602	-1.65926	3.8308	0.000672408	0.00656961	NA	NA	NA	NA	NA	NA	NA	NA	NA	NA	NA
Cysteineglutathione Disulfide	0.716761	0.819751	0.0975388	0.157761	129660	445773	0.290864	-1.78158	4.39017	0.000147789	0.00197873	Cofactor, vitamin and antioxidant metabolism	Glutathione metabolism	ANPPOS	NA	HMDB00656	NA	NA	NA	NA	NA	NA
Sorbitol	0.709198	1.37388	0.0965096	0.264404	1747242	6405679	0.272765	-1.87427	2.60958	0.0133732	0.0498392	Carbohydrate metabolism	Fructose and mannose metabolism	ANPNEG	C00749	HMDB00247	50-70-4	NA	NA	NA	NA	NA
849.6172@7.51	0.978615	0.723828	0.133173	0.139301	80337.1	298503	0.269133	-1.89361	5.51119	4.90736e-06	0.000154262	NA	Likely addducts of phospholipids	ANPNEG	NA	NA	NA	NA	NA	NA	NA	NA
GSSG	0.719316	0.832728	0.0978865	0.160259	304683	1.16156e+06	0.262304	-1.93069	4.02947	0.000398383	0.00457192	Cofactor, vitamin and antioxidant metabolism	Glutathione metabolism	ANPPOS	C00127	HMDB03337	27025-41-8	NA	NA	NA	NA	NA
Glycosylhistidine	146.262	0.639562	19.9037	0.123084	13831.8	63372.2	0.218263	-2.19586	6.786	9.90713e-08	8.6595e-06	Amino acids	Maillard-Reation-like dry-down artefact?	ANPNEG/ANPPOS	NA	NA	NA	NA	NA	NA	NA	NA
5'-Phosphoribosylglycinamide(GAR)	0.768892	1.22632	0.104633	0.236004	593125	2958776	0.200463	-2.31859	3.16642	0.00376521	0.020468	Purine and pyrimidine metabolism/nucleotide metabolism	Purine metabolism	ANPNEG	C03838	HMDB02022	10074-18-7	NA	NA	NA	NA	NA
Lumichrome	0.68841	1.48466	0.0936807	0.285723	375000	2.61707e+06	0.14329	-2.80299	3.63307	0.00118563	0.00898486	Cofactor, vitamin and antioxidant metabolism	Riboflavin metabolism	ANPNEG	C01727	NA	1086-80-2	NA	NA	NA	NA	NA
Thymidine	0.637016	1.33895	0.0866869	0.257682	78319	666401	0.117525	-3.08896	3.36987	0.00234266	0.0141145	Purine and pyrimidine metabolism/nucleotide metabolism	Pyrimidine metabolism	ANPPOS	C00214	HMDB00273	50-89-5	Nucleic acids	Nucleosides	Deoxyribonucleosides	none	none
